# Supplementary material for: The potential role of NT-proBNP in screening for and predicting prognosis in heart failure: a survival analysis
Source: PubMed Central journal article supplement — BMJ Open. 2014 Apr 19;4(4):e004675. doi: 10.1136/bmjopen-2013-004675 (PMC3996821; doi:10.1136/bmjopen-2013-004675), 2014-04-19
Supplement: bmjopen-2013-004675.draft_revisions.pdf [file bmjopen-2013-004675.draft_revisions.pdf]

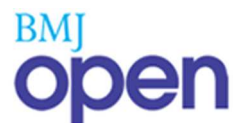

**The potential role of NT-proBNP in screening for and predicting prognosis in heart failure: a survival analysis.**

|                                 |                                                                                                                                                                                                                                                                                                            |
|---------------------------------|------------------------------------------------------------------------------------------------------------------------------------------------------------------------------------------------------------------------------------------------------------------------------------------------------------|
| Journal:                        | <i>BMJ Open</i>                                                                                                                                                                                                                                                                                            |
| Manuscript ID:                  | bmjopen-2013-004675                                                                                                                                                                                                                                                                                        |
| Article Type:                   | Research                                                                                                                                                                                                                                                                                                   |
| Date Submitted by the Author:   | 12-Dec-2013                                                                                                                                                                                                                                                                                                |
| Complete List of Authors:       | Taylor, Clare; University of Birmingham, Primary Care Clinical Sciences<br>Roalfe, Andrea; University of Birmingham, College of Medical and Dental Sciences<br>Hobbs, Richard; University of Oxford, Dept of Primary Health Care<br>Iles, Rachel; University of Birmingham, Primary Care Clinical Sciences |
| <b>Primary Subject Heading</b>: | Cardiovascular medicine                                                                                                                                                                                                                                                                                    |
| Secondary Subject Heading:      | Epidemiology                                                                                                                                                                                                                                                                                               |
| Keywords:                       | Cardiac Epidemiology < CARDIOLOGY, Echocardiography < CARDIOLOGY, Heart failure < CARDIOLOGY                                                                                                                                                                                                               |
|                                 |                                                                                                                                                                                                                                                                                                            |

SCHOLARONE™  
Manuscripts

1  
2  
3 **Title Page**  
4

5 **The potential role of NT-proBNP in screening for and predicting prognosis in heart**  
6 **failure: a survival analysis.**  
7

8  
9 **Taylor CJ, Roalfe AK, Iles R and Hobbs FDR**

10  
11 Dr Clare J Taylor, General Practitioner and NIHR Doctoral Research Fellow.  
12 Primary Care Clinical Sciences, University of Birmingham, Edgbaston, B15 2TT.  
13

14  
15 Mrs Andrea K Roalfe, Senior Lecturer in Medical Statistics.  
16 Primary Care Clinical Sciences, University of Birmingham, Edgbaston, B15 2TT.  
17

18  
19 Mrs Rachel Iles, Research Fellow.  
20 Primary Care Clinical Sciences, University of Birmingham, Edgbaston, B15 2TT.  
21

22  
23 Professor FD Richard Hobbs, Head of Department.  
24 Primary Care Health Sciences, University of Oxford, New Radcliffe House, Radcliffe  
25 Observatory Quarter, Walton Road, Oxford, OX21 6GG  
26 Tel: +44 (0)1865 289288  
27 E-mail: richard.hobbs@phc.ox.ac.uk (corresponding author)  
28  
29  
30  
31  
32  
33  
34  
35  
36  
37  
38  
39  
40  
41  
42  
43  
44  
45  
46  
47  
48  
49  
50  
51  
52  
53  
54  
55  
56  
57  
58  
59  
60

## **Abstract**

**Objectives:** To determine the potential role of N-terminal B type natriuretic peptide (NT-proBNP) in screening for and predicting prognosis in heart failure by examining diagnosis and survival of patients with a raised NT-proBNP at screening.

**Design:** Survival analysis.

**Setting:** Prospective sub-study of the Echocardiographic Heart of England Screening study (ECHOES) to investigate ten-year survival in participants with a NT-proBNP level at baseline.

**Participants:** 594 participants took part in the sub-study. Records of all participants in the ECHOES cohort were flagged during the screening phase which ended 25th February 1999. All deaths until 25th February 2009 were coded.

**Outcome measures:** Logistic regression was used to examine whether BNP is useful in predicting heart failure at screening after adjustment for age, sex and cohort. Kaplan Meier curves and log rank tests were used to compare survival times of participants according to NT-proBNP level. Cox regression was carried out to assess the prognostic effect of NT-ProBNP after allowing for significant covariates and receiver operator curves were used to determine test reliability.

**Results:** The risk of heart failure increased almost 18-fold when NT-proBNP was 150pg/ml or above (adjusted odds ratio=17.7 (95% CI 4.9 to 63.5). Ten-year survival in the general population cohort was 61% (95% CI 48% to 71%) for those with NT-proBNP $\geq$ 150pg/ml and 89% (95% CI 84% to 92%) for those below the cut-off at the time of the initial study. After adjustment for age, sex and risk factors for heart failure, NT-proBNP level  $\geq$  150pg/ml was associated with a 58% increase in the risk of death within 10 years (adjusted hazard ratio=1.58, 95% CI 1.09 to 2.30).

**Conclusions:** Raised NT-proBNP levels, when screening the general population, are predictive of a diagnosis of heart failure (at a lower threshold than guidelines for diagnosing symptomatic patients) and also predicted reduced survival at 10 years.

### **Keywords**

Heart failure, Prognosis, Natriuretic peptides, Screening, Diagnosis

### **Article Summary**

#### **Article focus**

To examine the role of natriuretic peptides in predicting a subsequent diagnosis of heart failure and survival over the next decade.

#### **Key messages**

1  
2  
3 In the Echocardiographic Heart of England Screening (ECHOES) study, N-terminal B  
4 type natriuretic peptide (NT-proBNP) levels above 150pg/ml were associated with  
5 both a diagnosis of heart failure at screening and reduced survival at ten years.  
6

7  
8 **Strengths and limitations of the study**

9 The ECHOES cohort represents a well-phenotyped group with accurate mortality  
10 data.  
11

12 Not all participants in the ECHOES cohort had a NT-proBNP measurement but the  
13 characteristics of the subgroup were similar to the whole cohort so are likely to be  
14 generalisable.  
15  
16  
17  
18  
19  
20  
21  
22  
23  
24  
25  
26  
27  
28  
29  
30  
31  
32  
33  
34  
35  
36  
37  
38  
39  
40  
41  
42  
43  
44  
45  
46  
47  
48  
49  
50  
51  
52  
53  
54  
55  
56  
57  
58  
59  
60

## **Manuscript**

### **Introduction**

Biomarkers can be useful in diagnosis, treatment monitoring and to inform prognosis.<sup>1 2 3</sup> B-type natriuretic peptide (BNP) and N-terminal pro-B-type natriuretic peptide (NT-proBNP) are released by the ventricles of the heart in response to volume and pressure overload. BNP relaxes vascular smooth muscle to reduce ventricular preload and acts on the kidney to increase sodium excretion and induce diuresis.<sup>4</sup> NT-proBNP is an inactive fragment of the cleaved pro-BNP molecule. Both peptides have been investigated for use in diagnosis of heart failure and left ventricular systolic dysfunction (LVSD).<sup>5 6</sup> NT-pro-BNP and BNP assays have been found to be equally reliable for diagnostic use.<sup>7</sup> Raised natriuretic peptide levels have consistently been associated with increased mortality in patients with heart failure.<sup>8 9</sup> There may also be a role for these assays in determining prognosis in patients with and without heart failure.<sup>10</sup>

The Echocardiographic Heart of England Screening (ECHOES) study was a large heart failure screening study carried out in central England.<sup>11</sup> All ECHOES participants underwent a detailed initial clinical assessment to screen for evidence of heart failure. Diagnosis was determined after blinded adjudication by a panel of 3 heart failure specialists using all the clinical and investigation data available from the screening. All deaths were collated from routine mortality data. We previously reported the 10-year prognosis of all patients in the ECHOES study according to presence or absence of heart failure and LVSD.<sup>12</sup> This analysis uses data from ECHOES to examine the role of NT-proBNP in predicting a diagnosis of heart failure at screening and also the relationship between NT-proBNP and survival in the following decade.

### **Methods**

The original ECHOES study screened a total of 6162 participants from sixteen practices in Central England. Four practices were randomly selected from each of the four socio-economic groups defined using the Townsend deprivation score. This resulted in a socio-economically diverse population, likely to be representative of the broader UK population. ECHOES included four separate cohorts: 3960 patients randomly sampled from the general population over age 45; 782 patients with a previous label of heart failure recorded in GP notes; 928 patients on diuretic therapy; and 1062 with known risk factors for heart disease (hypertension, diabetes, angina, history of myocardial infarction). Patients underwent assessment (history, examination, electrocardiogram and echocardiography) to screen for evidence of heart failure.

A substudy involving 594 ECHOES participants was also carried out to investigate the role of NT-proBNP in diagnosis and prognosis of heart failure. Fuller methods are available in an earlier publication<sup>11</sup> but in brief, participants came from 4 general practices, across the Townsend scale; 309 were sampled from the general population, 103 with a previous label of heart failure, 88 on diuretic therapy and 134

1  
2  
3 with risk factors of heart disease with some patients belonging to more than one  
4 cohort.  
5  
6

7  
8 During the ECHOES study, which ran from March 1995 to February 1999, the records  
9 of all participants were flagged by the Office for National Statistics (ONS) Central  
10 Register Office. The ONS has provided details of the date and cause of death for all  
11 ECHOES participants since then. The final participant in the original ECHOES cohort  
12 was screened on 25<sup>th</sup> February 1999 and all deaths up to the 25th February 2009 had  
13 been notified to the research team. This allowed an estimate of 10-year prognosis  
14 for patients in ECHOES including those from the NT-proBNP study. All data from the  
15 original ECHOES cohort were recorded in a restricted access database. The statistical  
16 packages SPSS and Stata 10 were used to analyse the data.  
17  
18

### 19 20 *Analytical methods*

21 Area under the receiver operating curves (AUROC) were calculated, for each cohort,  
22 to measure the natriuretic peptide's performance in predicting heart failure at  
23 screening. Multiple logistic regression was then performed, using all cohorts  
24 combined, to examine whether BNP was predictive of heart failure, after adjustment  
25 for the sampling structure and other significant predictors. Variables in the final  
26 model were selected using the backward elimination method with significance level  
27 set at 0.05.  
28  
29

30 Variables considered in the analysis included NT-proBNP, age, sex, body mass index  
31 (BMI), smoking status, blood pressure, individual risk factors for heart failure  
32 (hypertension, angina, MI, diabetes), symptoms (tiredness, shortness of breath,  
33 ankle oedema), prescribed drugs (beta-blockers, ace inhibitors, ARBs and diuretics);  
34 and whether a previous label of heart failure was recoded. Two-way interactions  
35 with natriuretic peptide were also considered. The cohort-related variables were  
36 kept in the final model to allow for the sampling structure. To improve the precision  
37 of the estimates, bootstrapped confidence intervals for odds ratios were calculated  
38 using 1000 replications.  
39  
40  
41

42 Survival analysis was carried out, by each cohort, using Kaplan-Meier curves to  
43 demonstrate survival in those with an NT-proBNP level  $\geq 150$ pg/ml. Log rank tests  
44 were used to compare survival between the different groups. The mean survival  
45 times were calculated rather than median since data was censored for more than  
46 50% of cases. Estimation of the mean is limited to the largest survival time if data  
47 were censored.  
48  
49

50 Cox regression was then undertaken, using all 594 participants, to assess the  
51 prognostic ability of NT-proBNP after allowing for each cohort and other covariates.  
52 Variables entered into the starting model are as described previously with the  
53 addition of atrial fibrillation, ejection fraction and significant valve disease. Fractional  
54 polynomials were considered when comparing models of best fit for continuous  
55 variables of age, BMI and blood pressure. The proportional hazards assumption was  
56 tested using Schoenfeld residuals.  
57  
58  
59  
60

## Results

NT-proBNP levels were measured in 594 participants during the ECHOES study. A heart failure diagnosis was confirmed for 7 (8%) of those in the general population sample; 36 (35%) of those with a previous label of heart failure; 15 (17%) of those on diuretics; and 9 (7%) of those at high risk. Twenty three (43%) of all those with a heart failure diagnosis had an ejection fraction of less than 40% and an additional 10 persons (19%) had ejection fraction of between 40 and 49%.

The baseline characteristics of all participants in the sub-study, broken down by cohort and NT-proBNP 150pg/ml cut-off are shown in table 1. Those in the upper NT-proBNP category were older, had more cardiovascular risk factors and took more medication than those below 150pg/ml. They also, with exception of those from the cohort with previous label of heart failure, had more symptoms of heart failure.

The distributions of NT-proBNP in each cohort are given in table 2. The general population had the lowest values with more than 75% below 150pg/ml. Highest levels were observed in the cohort with a previous label of heart failure.

TABLE 1

TABLE 2

Figures 1 to 4 show the Receiver Operating Curves for assessing the performance of NT-proBNP in diagnosing heart failure in each of the cohorts. The area under the receiver operating curve (AUROC) for NT-proBNP levels above 150 pg/ml was 0.95 (95%CI 0.88 to 1.00) for the general population; 0.83 (0.75 to 0.91) for those with previous label of HF; 0.91(0.82 to 1.00) for those on diuretics; and 0.88 (0.80 to 0.97 for those at risk of heart failure]. The cut-off for NT-proBNP at 150pg/ml had sensitivity of 100% (95% CI ( 59.0% to 100%)) and specificity of 79.5% (95%CI( 74.5% to 83.9% )) in identifying heart failure in the general population sample; [97.2%(85.5% to 99.9%) sensitivity and 29.9%(19.3% to 42.3%) specificity for those with previous label of HF; 93.3%(68.1% to 99.8%) sensitivity and 43.8%(32.2% to 55.9%) specificity for those on diuretics; and 100%(66.4% to 100%) sensitivity and 53.6%(44.5% to 62.6%) specificity for those at high risk]. Other cut-offs were not considered in this analysis due to the high sensitivity and reasonable specificity observed using the chosen cut-off. Overall, a cut-off of 150pg/ml found 100% of heart failure cases and 80% of non-heart failure cases. The percentage of deaths at 10 years with NT-proBNP  $\geq$ 150pg/ml at baseline was 50% in the general population, 86% in HF label group, 71% in the high risk group and 84% in the diuretics group.

FIGURES 1 TO 4

The multiple logistic regression analysis suggests that BNP>150pg/ml is predictive of heart failure (OR=17.7 (95%CI 4.9 to 63.5)) after allowing for cohort related variables (Table 3).

## TABLE 3

*Cause of death*

Cardiovascular disease was the main cause of death in each cohort, ranging from 31% (95%CI 20% to 46%) in the general population to 49% (95% CI 37% to 61%) in the high risk group. The remaining deaths were mainly due to respiratory disease and cancer.

*Survival analysis of the general population cohort*

There was a statistically significant difference in survival between those who had an NT-proBNP level  $\geq 150$ pg/ml and those with an NT-proBNP level  $<150$ pg/ml in the general population sample (log-rank test,  $\chi^2 = 30.4$ , 1,  $P < 0.0001$ ) as shown in figure 5. Mean survival for those with an NT-proBNP  $\geq 150$ pg/ml was 8.7 years (95%CI 8.0 to 9.4) compared to 9.9 years (95%CI 9.7 to 10.2) for those with an NT-proBNP  $<150$ pg/ml. Ten-year survival was 61% (95%CI 48% to 71%) for those with a NT-proBNP  $\geq 150$ pg/ml and 89% (95%CI 84% to 92%) for those with NT-proBNP  $<150$ pg/ml at the time of the initial study.

## FIGURE 5

*Survival analysis of the other cohorts*

Reduced length of survival was also observed for those above the NT-proBNP cut-off when compared with those below the cut-off in each of the other cohorts ( $p < 0.001$ ). Those sampled with a previous label of HF and with NT-proBNP  $\geq 150$ pg/ml had a mean survival of 5.8 years (95%CI 5.0 to 6.5) compared to 8.4 years (95%CI 7.1 to 9.7) for those below the cut-off (figure 6). The comparative results for those on diuretics (figure 7) were 7.0 years (6.0 to 7.9) vs 9.5 years (8.7 to 10.4); and those at high risk (figure 8) 8.3 years (7.6 to 9.0) vs. 9.4 years (8.8 to 10.0).

## FIGURE 6-8

*Cox regression analysis of all cohort data*

After adjustment for demographic variables, shortness of breath and NT-proBNP  $\geq 150$ pg/ml was found to increase the risk of death by 58% (HR=1.58 (1.09 to 2.30)).

## Table4



## Discussion

### *Summary of main findings*

594 participants of the ECHOES study took part in the NT-proBNP substudy. Mean survival time for participants from the general population with an NT-proBNP  $\geq$  150pg/ml was over one year less than participants with NT-proBNP  $<$  150pg/ml (8.7 vs 9.9 years). The proportion of patients surviving ten years was significantly lower in the group with an NT-proBNP level  $\geq$  150pg/ml compared to an NT-proBNP level  $<$  150pg/ml (61% vs 89% respectively in the general population). An NT-proBNP level  $\geq$  150pg/ml was strongly predictive of a diagnosis of heart failure at screening and of death in the next ten years.

### *Strengths and limitations of the study*

The ECHOES study represents a unique cohort of patients with well phenotyped heart failure from a community setting. The rigor of clinical assessment means the diagnosis of heart failure is accurate. All participants notes were flagged by ONS to ensure accurate data about date and cause of death were sent to the research team. NT-proBNP levels were not recorded in all participants of the ECHOES study however the baseline characteristics of the NT-proBNP substudy were similar to those of the study population as a whole. Only 3% of participants were non-white which may not accurately reflect the ethnic diversity of the UK population and NT-proBNP levels may vary depending on ethnicity. Renal function was not recorded in this study therefore we were unable to assess the effect of renal impairment on mortality.<sup>13</sup> A cut off of 150pg/ml was chosen to represent a raised level of NT-proBNP in the substudy however debate exists around the optimal cut off level for NT-proBNP.<sup>14</sup>

### *Comparison with existing literature*

A study by Wang et al investigated the relationship between BNP levels and risk of cardiovascular events or death in 3346 patients from the Framingham cohort who did not have heart failure at baseline.<sup>8</sup> 119 participants died and 79 had a first cardiovascular event during a mean follow-up of 5.2 years. For each one standard deviation increment increase in log BNP level, risk of developing heart failure increased by 77% ( $p < 0.001$ ) and risk of death increased by 27% ( $p = 0.009$ ).

BNP and NT-proBNP levels also increase with heart failure stage. A study of patients over the age of 45 from the Rochester Epidemiology Study found that mean BNP (rather than NT-proBNP) level was 26pg/ml in patients without heart failure, 32pg/ml in those with risk factors, 53pg/ml in those asymptomatic participants with structural or functional cardiac abnormalities, 137pg/ml in participants with heart failure symptoms and 353pg/ml for participants with severe heart failure. Survival declined progressively for each additional stage of disease.<sup>15</sup>

Another study by Hartmann et al investigated the role of baseline NT-proBNP in predicting mortality and hospitalisation in patients with a diagnosis of heart failure.<sup>9</sup> NT-proBNP levels were recorded in 814 men and 197 women with severe heart failure defined as breathlessness at rest or on minimal exertion and an ejection fraction of less than 25%. They were followed up for a median time of 159 days

1  
2  
3 (range 1-488 days). A baseline NT-proBNP level above compared to below the  
4 median level for the cohort was a strong predictor of all-cause mortality and  
5 hospitalisation for heart failure (relative risk 2.4; 95%CI 1.8-3.4; p=0.0001). NT-  
6 proBNP has also been found to be an independent predictor of mortality in patients  
7 with renal disease.<sup>10</sup>  
8  
9

#### 10 *Implications of future research and practice*

11 In this substudy, participants with a raised NT-proBNP level were more likely to have  
12 a confirmed diagnosis of heart failure after screening. Natriuretic peptides are  
13 already used in clinical practice to determine the likelihood of heart failure and guide  
14 referral for echocardiography however the optimal cut-off level is still unclear.<sup>16 17</sup>  
15 The National Institute for Health and Clinical Excellence (NICE) clinical guideline on  
16 the management of chronic heart failure recommends an NT-proBNP of 400 pg/ml is  
17 used as the threshold to refer for echocardiography in symptomatic patients,  
18 whereas the European Society of Cardiology suggest a threshold level of 125 pg/ml  
19 to exclude heart failure. Fuat et al showed that a cut-off of 150 pg/ml had a negative  
20 predictive value of 92% in a primary care community heart failure clinic, again in  
21 symptomatic patients.<sup>18</sup> Our data suggest that the current NICE cut-off is too high  
22 and that 150 pg/ml is a more reliable threshold for further investigation, especially  
23 since our data includes asymptomatic as well as symptomatic non-presenting  
24 patients.  
25  
26  
27  
28

29 Importantly, participants in the NT-proBNP substudy with a raised NT-proBNP were  
30 also more likely to die sooner than participants with a normal NT-proBNP level.  
31 These data confirm the potential for incident NT-proBNP tests to indicate patient  
32 prognosis in primary care settings as has been confirmed in hospital settings.  
33 Assessment of patients to establish the cause of a raised NT-proBNP level such as  
34 heart failure or renal disease followed by optimal management using evidence based  
35 therapies is crucial to reducing mortality in these high risk patients.  
36  
37

38 Finally, these data are the first we are aware of that suggest a possible role for  
39 natriuretic peptides in population screening for heart failure. Given the late  
40 diagnosis in many patients and the asymptomatic nature in early stages, this may be  
41 an important finding.  
42  
43  
44  
45  
46  
47  
48  
49  
50  
51  
52  
53  
54  
55  
56  
57  
58  
59  
60

## Tables

| Characteristics                                   | General population<br>(n=309)      |                                 | Previous label of HF (n=103)      |                                 | On diuretics<br>(n=88)           |                                 | High risk<br>(n=134)              |                                 |
|---------------------------------------------------|------------------------------------|---------------------------------|-----------------------------------|---------------------------------|----------------------------------|---------------------------------|-----------------------------------|---------------------------------|
|                                                   | NTproBNP<br>< 150 pg/ml<br>(n=240) | NTproBNP<br>≥150pg/ml<br>(n=69) | NTproBNP<br>< 150 pg/ml<br>(n=21) | NTproBNP<br>≥150pg/ml<br>(n=82) | NTproBNP<br>< 150pg/ml<br>(n=33) | NTproBNP<br>≥150pg/ml<br>(n=55) | NTproBNP<br>< 150 pg/ml<br>(n=67) | NTproBNP<br>≥150pg/ml<br>(n=67) |
| <b>Demographics</b>                               |                                    |                                 |                                   |                                 |                                  |                                 |                                   |                                 |
| Age at screening<br>[mean (sd) years]             | 59.6 (8.7)                         | 71.7 (9.7)                      | 72.2 (9.6)                        | 74.7 (8.4)                      | 63.2 (8.8)                       | 74.1 (9.8)                      | 63.2 (8.7)                        | 70.4 (8.2)                      |
| Gender, male                                      | 130 (54)                           | 31 (45)                         | 9 (43)                            | 47 (57)                         | 24 (73)                          | 26 (47)                         | 43 (64)                           | 33 (49)                         |
| Ever Smoked                                       | 137 (57)                           | 37 (54)                         | 17 (81)                           | 45 (55)                         | 21 (64)                          | 32 (58)                         | 42 (63)                           | 48 (72)                         |
| Body mass index<br>[mean (sd) kg/m <sup>2</sup> ] | 27.0 (4.9)                         | 25.8 (3.8)                      | 31.1 (8.5)                        | 26.6 (4.4)                      | 27.9 (3.5)                       | 26.8 (4.5)                      | 28.4 (4.1)                        | 27.1 (3.8)                      |
| Systolic BP<br>[mean(sd)mm/Hg]                    | 149.3 (20.9)                       | 156.1 (23.3)                    | 162.9(18.3)                       | 149.2(26.3)                     | 161.7(22.6)                      | 154.8 (25.2)                    | 155.2 (18.3)                      | 158.7 (23.4)                    |
| Diastolic BP<br>[mean(sd)mm/Hg]                   | 85.6 (10.9)                        | 83.6 (9.9)                      | 84.4 (9.5)                        | 78.0 (12.6)                     | 91.7 (10.3)                      | 82.4 (14.2)                     | 83.9 (10.1)                       | 83.6 (11.7)                     |
| <b>History</b>                                    |                                    |                                 |                                   |                                 |                                  |                                 |                                   |                                 |
| Diabetes                                          | 9 (4)                              | 6 (9)                           | 4 (19)                            | 14 (17)                         | 3 (9)                            | 8 (15)                          | 24 (36)                           | 12 (18)                         |
| Myocardial<br>Infarction                          | 5 (2)                              | 7 (10)                          | 4 (19)                            | 26 (32)                         | 2 (6)                            | 8 (15)                          | 16 (24)                           | 36 (54)                         |
| Angina                                            | 12 (5)                             | 16 (23)                         | 7 (33)                            | 33 (40)                         | 3 (9)                            | 14 (25)                         | 23 (34)                           | 46 (69)                         |
| Hypertension                                      | 54 (22)                            | 24 (35)                         | 9 (43)                            | 27 (33)                         | 29 (88)                          | 31 (56)                         | 38 (57)                           | 39 (58)                         |
| <b>Medication taken</b>                           |                                    |                                 |                                   |                                 |                                  |                                 |                                   |                                 |
| Diuretics                                         | 15 (6)                             | 20 (29)                         | 16 (76)                           | 17 (85)                         | 22 (67)                          | 53 (96)                         | 12 (18)                           | 26 (39)                         |
| Ace Inhibitors                                    | 12 (5)                             | 5 (7)                           | 4 (19)                            | 39 (48)                         | 10 (30)                          | 20 (36)                         | 19 (28)                           | 18 (27)                         |
| ARBs                                              | 3 (1)                              | 0 (0)                           | 1 (5)                             | 7 (9)                           | 0 (0)                            | 1 (2)                           | 2 (3)                             | 0 (0)                           |

|                                         |            |         |         |         |         |         |         |         |
|-----------------------------------------|------------|---------|---------|---------|---------|---------|---------|---------|
| Beta-blockers                           | 14 (6)     | 19 (28) | 2 (10)  | 9 (11)  | 5 (15)  | 8 (15)  | 17 (25) | 21 (31) |
| <b>Symptoms</b>                         |            |         |         |         |         |         |         |         |
| Shortness of breath                     | 48 (20)    | 32 (46) | 16 (76) | 61 (74) | 11 (33) | 34 (62) | 17 (25) | 44 (66) |
| Tired                                   | 70 (29)    | 33 (48) | 15 (71) | 62 (75) | 12 (36) | 35 (64) | 27 (40) | 42 (63) |
| Ankle swelling                          | 38 (16)    | 22 (32) | 15 (71) | 41 (50) | 10 (30) | 29 (53) | 22 (33) | 22 (33) |
| <b>New York Heart Association class</b> |            |         |         |         |         |         |         |         |
| 1                                       | 200 (83)   | 39 (57) | 5 (24)  | 22 (27) | 23 (70) | 21 (38) | 57 (78) | 28 (42) |
| 2                                       | 35 (15)    | 23 (33) | 11 (52) | 30 (37) | 7 (21)  | 21 (38) | 10 (15) | 29 (43) |
| 3                                       | 4 (2)      | 2 (3)   | 3 (14)  | 15 (18) | 3 (9)   | 8 (15)  | 1 (1)   | 6 (9)   |
| 4                                       | 1 (0.4)    | 5 (7)   | 2 (10)  | 15 (18) | 0 (0)   | 5 (9)   | 4 (6)   | 4 (6)   |
| <b>Ejection fraction</b>                |            |         |         |         |         |         |         |         |
| <40%                                    | 1 (0.4)    | 4 (6)   | 1 (5)   | 20 (24) | 1 (3)   | 6 (11)  | 1 (1)   | 9 (13)  |
| 40-49%                                  | 2 (0.8)    | 3 (4)   | 2 (10)  | 18 (22) | 1 (3)   | 6 (11)  | 3 (4)   | 6 (9)   |
| >=50%                                   | 237 (98.7) | 62 (90) | 18 (86) | 44 (54) | 31 (94) | 43 (78) | 63 (94) | 52 (78) |
| <b>Diagnosis</b>                        |            |         |         |         |         |         |         |         |
| Definite heart failure                  | 0 (0)      | 7 (10)  | 1 (5)   | 35 (43) | 1 (3)   | 14 (25) | 0 (0)   | 9 (13)  |
| Atrial fibrillation                     | 0 (0)      | 7 (10)  | 0 (0)   | 23 (28) | 0 (0)   | 13 (24) | 0 (0)   | 3 (4)   |
| Significant valve disease               | 0 (0)      | 5 (7)   | 1 (5)   | 9 (11)  | 0 (0)   | 7 (13)  | 0 (0)   | 3 (4)   |

Table 1 – Baseline characteristics of patients in the ECHOES NT-proBNP sub-study

| Cohort               | N   | Mean (sd)       | Median (IQR)          |
|----------------------|-----|-----------------|-----------------------|
| General population   | 309 | 159.7 (334.7)   | 70.9 (35.3 to 130.1)  |
| Previous label of HF | 103 | 1099.9 (1589.1) | 493.6 (204.3 to 1341) |
| On diuretics         | 88  | 653.3 (1149.4)  | 200 (76.1 to 672.8)   |
| At high risk         | 134 | 388.5 (983.1)   | 160.1 (64.6 to 386.3) |

Table 2 Distribution of NT-proBNP in each cohort

| Variable                   | Odds Ratio (95% confidence interval*) | P value |
|----------------------------|---------------------------------------|---------|
| Previous label of HF       | 3.74 (1.45 to 9.69)                   | 0.007   |
| On diuretics               | 5.26 (1.70 to 16.31)                  | 0.004   |
| Diabetes                   | 4.91 (1.66 to 14.51)                  | 0.004   |
| Hypertension               | 0.39 (0.16 to 0.97)                   | 0.04    |
| Angina                     | 1.22 (0.99 to 5.00)                   | 0.053   |
| Myocardial infarction      | 1.61 (0.67 to 3.86)                   | 0.29    |
| NT-proBNP $\geq$ 150 pg/ml | 17.65 (4.91 to 63.48)                 | <0.001  |

\*Bootstrapped estimates

Table 3 Logistic regression model to predict heart failure

| Variable                        | Hazard Ratio (95% confidence interval*) | P value |
|---------------------------------|-----------------------------------------|---------|
| Age                             | 1.10 (1.08 to 1.10)                     | <0.001  |
| Sex                             | 2.05 (1.43 to 2.95)                     | <0.001  |
| Previous label of HF            | 1.75 (1.17 to 2.57)                     | 0.007   |
| On diuretics                    | 0.90 (0.62 to 1.32)                     | 0.59    |
| Diabetes                        | 1.08 (0.65 to 1.88)                     | 0.78    |
| Hypertension                    | 1.37 (0.99 to 1.90)                     | 0.06    |
| Angina                          | 1.04 (0.73 to 1.50)                     | 0.82    |
| Myocardial infarction           | 1.18 (0.80 to 1.73)                     | 0.40    |
| Shortness of breath             | 1.64 (1.14 to 2.37)                     | 0.008   |
| NT-proBNP $\geq$ 150 $\mu$ g/ml | 1.58 (1.09 to 2.30)                     | 0.02    |

\*Bootstrapped estimates

Table 4 Cox regression model of factors associated with mortality

1  
2  
3 **Authors' contributions:** F.D.R.H. was principal investigator and established the  
4 ECHOES cohort. C.J.T. and F.D.R.H. designed this study. C.J.T. and A.K.R. undertook  
5 statistical analysis. C.J.T. and R.I. coded the death data. All authors contributed to the  
6 manuscript.  
7

8  
9 **Acknowledgements:** We would like to acknowledge Dr Michael Davies and Dr  
10 Russell Davis for their contribution to the original ECHOES study from which these  
11 10-year follow-up data are derived.  
12

13  
14 **Ethical approval:** The study received full ethical approval from the local research  
15 ethics committee.  
16

17 **Funding:** The costs for this analysis were partially supported by the NIHR School for  
18 Primary Care Research. The National Health Service Research and Development  
19 Cardiovascular Disease and Stroke Programme funded the original Echocardiographic  
20 Heart of England Screening Study. CT is funded by a Doctoral Research Fellowship  
21 from the National Institute for Health Research.  
22

23  
24 **Competing interests:** All authors have completed the ICMJE uniform disclosure form  
25 at [www.icmje.org/coi\\_disclosure.pdf](http://www.icmje.org/coi_disclosure.pdf) and declare: The NT-proBNP assays for the  
26 ECHOES study were provided free of charge by Roche Diagnostics, but Roche were  
27 not party to the study design, nor any aspect of the analysis, nor to the write up of  
28 this paper. FDRH has received similar indirect research support on other investigator  
29 led heart failure research. FDRH has also received occasional fees or expense  
30 reimbursement from Roche in the past; no other relationships or activities that could  
31 appear to have influenced the submitted work.  
32  
33

34  
35 **Copyright license:** The Corresponding Author has the right to grant on behalf of all  
36 authors and does grant on behalf of all authors, a worldwide licence to the  
37 Publishers and its licensees in perpetuity, in all forms, formats and media (whether  
38 known now or created in the future), to i) publish, reproduce, distribute, display and  
39 store the Contribution, ii) translate the Contribution into other languages, create  
40 adaptations, reprints, include within collections and create summaries, extracts  
41 and/or, abstracts of the Contribution, iii) create any other derivative work(s) based  
42 on the Contribution, iv) to exploit all subsidiary rights in the Contribution, v) the  
43 inclusion of electronic links from the Contribution to third party material where-ever  
44 it may be located; and, vi) licence any third party to do any or all of the above.  
45  
46  
47  
48  
49  
50  
51  
52  
53  
54  
55  
56  
57  
58  
59  
60

## References

- 1 de Lemos JA, McGuire DK, Drazner MH. B-type natriuretic peptide in cardiovascular disease. *Lancet* 2003;362(9380):316-22
- 2 Escobar c, Santiago-Ruiz JL, Manzano L. Diagnosis of heart failure in elderly patients: a clinical challenge. *Eur J Heart Fail* (2011) 13(10): 1152
- 3 Ahmad T and O'Connor C. Therapeutic implications of biomarkers in chronic heart failure *Clin Pharmacol Ther.* 2013 Oct;94(4):468-79. doi: 10.1038/clpt.2013.139. Epub 2013 Jul 15
- 4 Mark DB, Felker GM. B-type natriuretic peptide - a biomarker for all seasons? *New England Journal of Medicine* 2004;350(7):718-20.
- 5 Cowie MR, Struthers AD, Wood DA, Coats AJS, Thompson SG, Poole-Wilson PA, Sutton GC. Value of natriuretic peptides in assessment of patients with possible new heart failure in primary care. *Lancet* 1997;350:1347-51
- 6 Mant J, Doust J, Roalfe A, Barton P, Cowie M R, Glasziou P. Systematic review and individual patient data meta-analysis of diagnosis of heart failure, with modelling of implications of different diagnostic strategies in primary care. *Health Technol Assess* 2009;13(32)
- 7 Hobbs FD, Davis RC, Roalfe AK, Hare R, Davies MK. Reliability of N-terminal proBNP assay in diagnosis of left ventricular systolic dysfunction within representative and high risk populations. *Heart* 2004;90(8):866-70.
- 8 Wang TJ, Larson MG, Levy D, Benjamin EJ, Leip EP, Omland T, et al. Plasma natriuretic peptide levels and the risk of cardiovascular events and death. *New England Journal of Medicine* 2004;350(7):655-63
- 9 Hartmann F, Packer M, Coats AJ, Fowler MB, Krum H, Mohacs P, et al. Prognostic impact of plasma N-terminal pro-brain natriuretic peptide in severe chronic congestive heart failure: a substudy of the Carvedilol Prospective Randomized Cumulative Survival (COPERNICUS) trial. *Circulation* 2004;110(13):1780-6
- 10 Svensson M, Gorst-Rasmussen A, Schmidt EB et al. NT-pro-BNP is an independent predictor of mortality in patients with end-stage renal disease. *Clin Nephrol* 2009;71(4): 380-6
- 11 Davies M, Hobbs F, Davis R, Kenkre J, Roalfe AK, Hare R, Wosornu D, Lancashire RJ. Prevalence of left-ventricular systolic dysfunction and heart failure in the Echocardiographic Heart of England Screening study: a population based study. *Lancet* 2001;358(9280):439-44.
- 12 Taylor CJ, Roalfe AK, Iles R and Hobbs FDR. Ten-year prognosis of heart failure in the community: follow-up data from the Echocardiographic Heart fo England Screening (ECHOES) study. *Eur J Heart Fail* 2012;14(2): 176-184
- 13 Brandimarte F, Vaduganathan M, Mureddu GF, Cacciatore G, Sabbah HN, Fonarow GC, Goldsmith SR, Butler J, Fedele F, Gheorghide M. Prognostic implications of renal dysfunction in patients hospitalised with heart failure: data from the last decade of clinical investigations. *Heart Fail Rev* 2013;18(2):167-76
- 14 Januzzi JL, Chen-Tournoux AA and Moe G. Amino-Terminal Pro-B-Type Natriuretic Peptide Testing for the Diagnosis or Exclusion of Heart Failure in Patients with Acute Symptoms. *Am J Cardiol* 2008;101[suppl]:29A-38A
- 15 Ammar KA, Jacobsen SJ, Mahoney DW, Kors JA, Redfield MM, Burnett JC, Jr. Prevalence and prognostic significance of heart failure stages: application of the



1  
2  
3  
4 American College of Cardiology/American Heart Association heart failure staging  
5 criteria in the community. *Circulation* 2007;115(12):1563-70.

6 <sup>16</sup> National Institute of Health and Clinical Excellence. Chronic Heart Failure.  
7 Management of chronic heart failure in adults in primary and secondary care. NICE  
8 2010

9 <sup>17</sup> European Society of Cardiology guidelines for the diagnosis and treatment of acute  
10 and chronic heart failure 2012. *European Heart Journal* 2012;33:1787–1847  
11 doi:10.1093/eurheartj/ehs104

12 <sup>18</sup> Fuat A, Murphy JJ, Hungin AP, Curry J, Mehrzad AA, Hetherington A, Johnston JI,  
13 Smellie WS, Duffy V, Cawley P. The diagnostic accuracy and utility of a B-type  
14 natriuretic peptide test in a community population of patients with suspected heart  
15 failure. *Br J Gen Pract* 2006;56(526):327-33  
16  
17  
18  
19  
20  
21  
22  
23  
24  
25  
26  
27  
28  
29  
30  
31  
32  
33  
34  
35  
36  
37  
38  
39  
40  
41  
42  
43  
44  
45  
46  
47  
48  
49  
50  
51  
52  
53  
54  
55  
56  
57  
58  
59  
60

1  
2  
3  
4  
5  
6  
7  
8  
9  
10  
11  
12  
13  
14  
15  
16  
17  
18  
19  
20  
21  
22  
23  
24  
25  
26  
27  
28  
29  
30  
31  
32  
33  
34  
35  
36  
37  
38  
39  
40  
41  
42  
43  
44  
45  
46  
47  
48  
49  
50  
51  
52  
53  
54  
55  
56  
57  
58  
59  
60

Figures

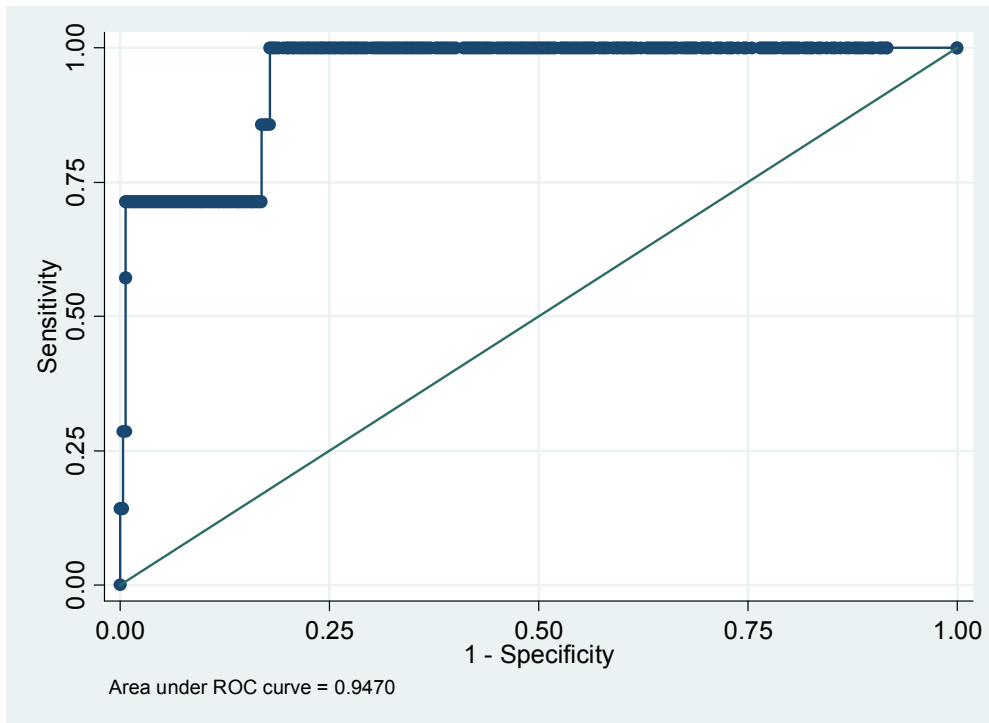

Figure 1 – Receiver operating characteristic curve to show effectiveness of baseline NT-proBNP in predicting a diagnosis of heart failure at screening in the general population cohort

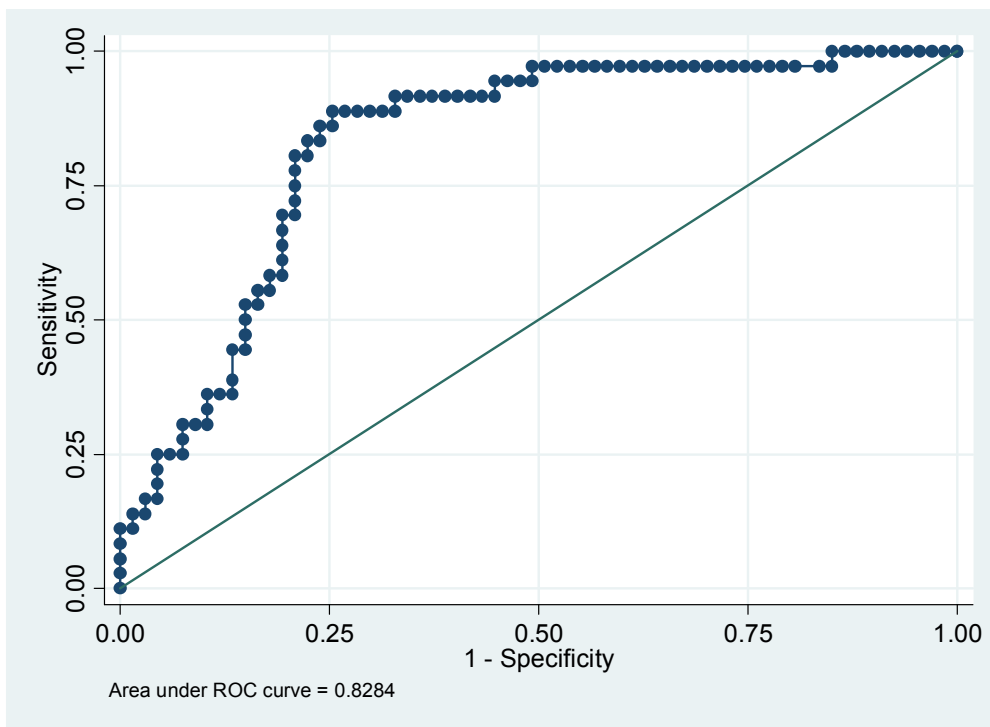

Figure 2. ROC curve for cohort with previous label of heart failure

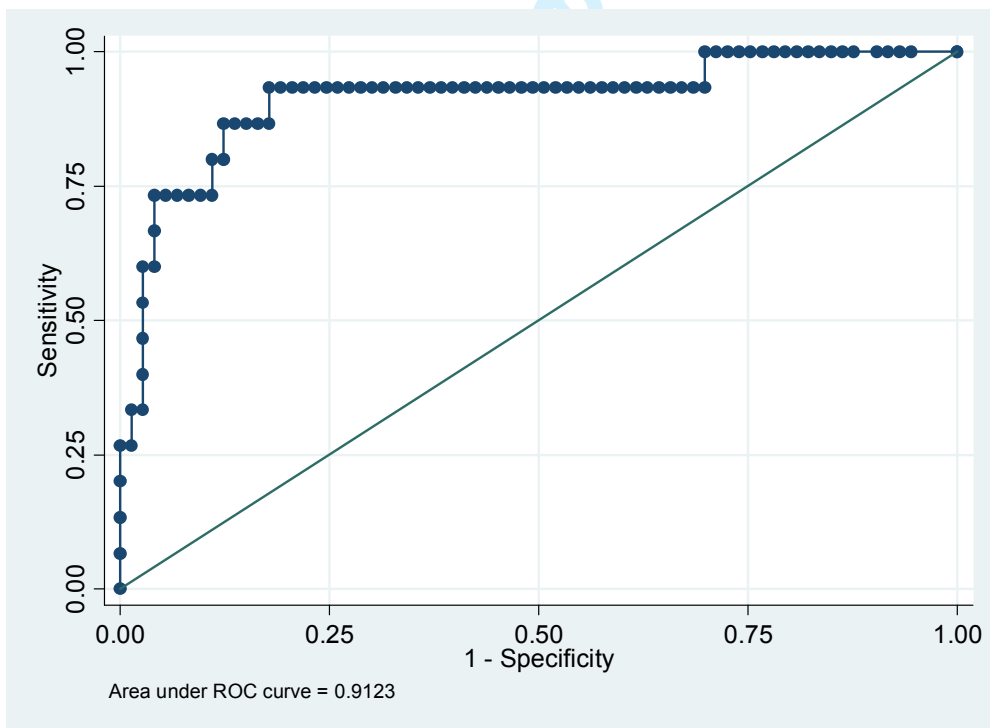

Figure 3. ROC curve for cohort who were on prescribed diuretics

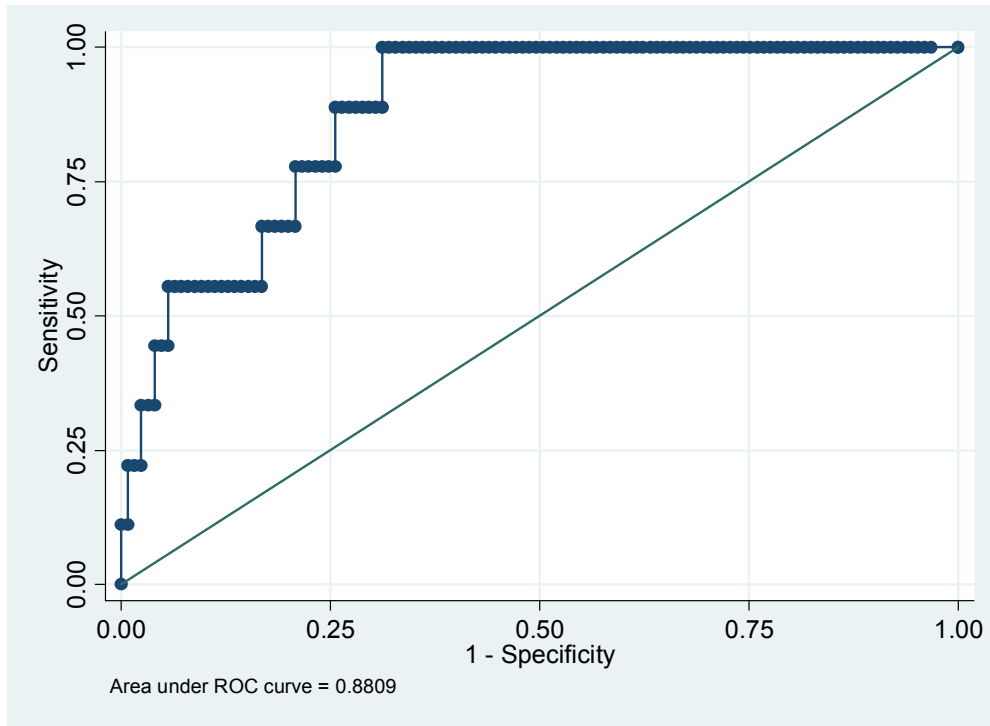

Figure 4 ROC curve for the high risk cohort

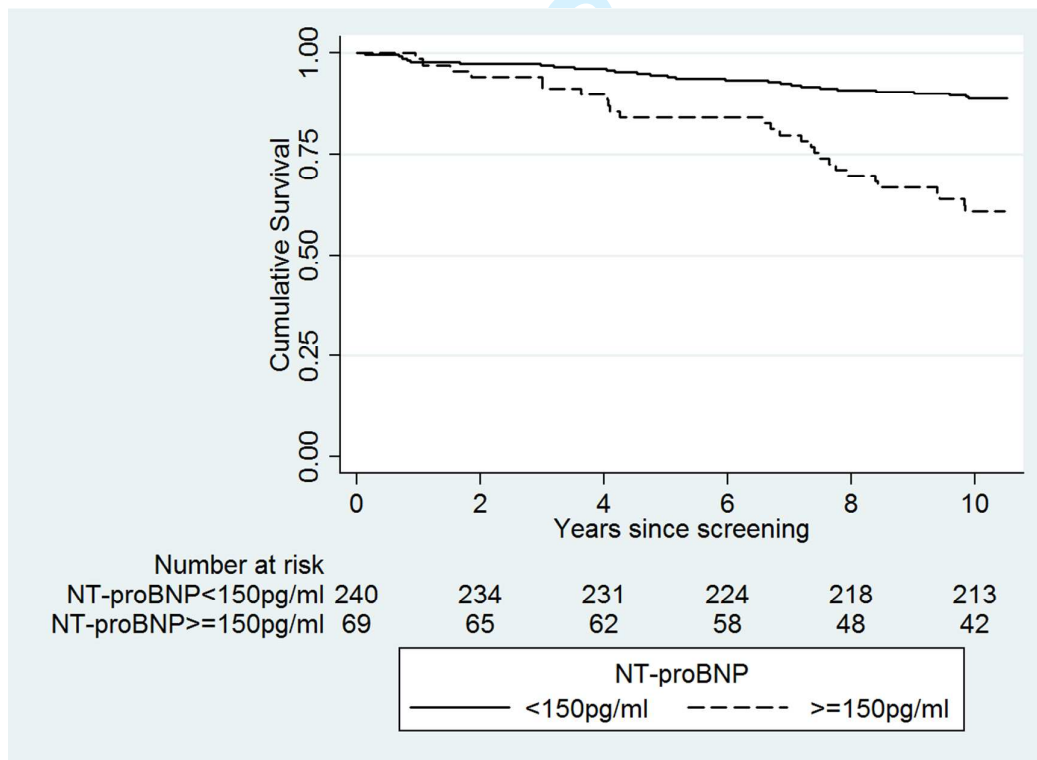

Figure 5 - Kaplan-Meier curve showing NT-proBNP level and ten year survival for the general population cohort.

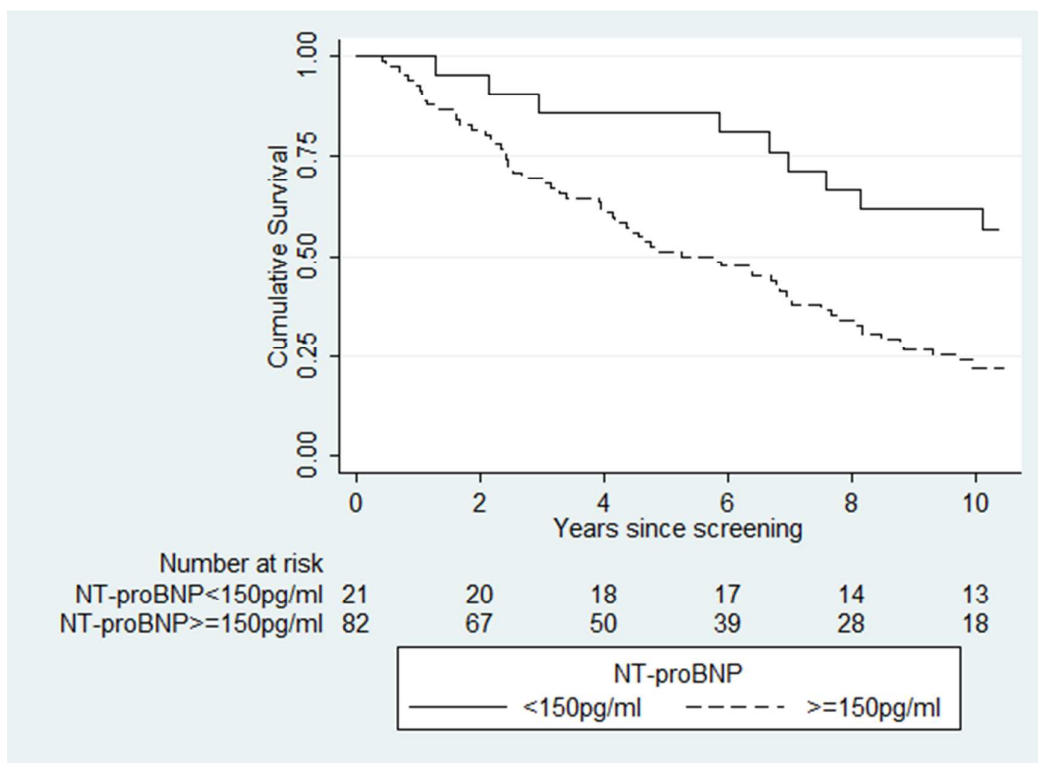

Figure 6 - Kaplan-Meier curve showing NT-proBNP level and ten year survival for the cohort with a previous label of heart failure.

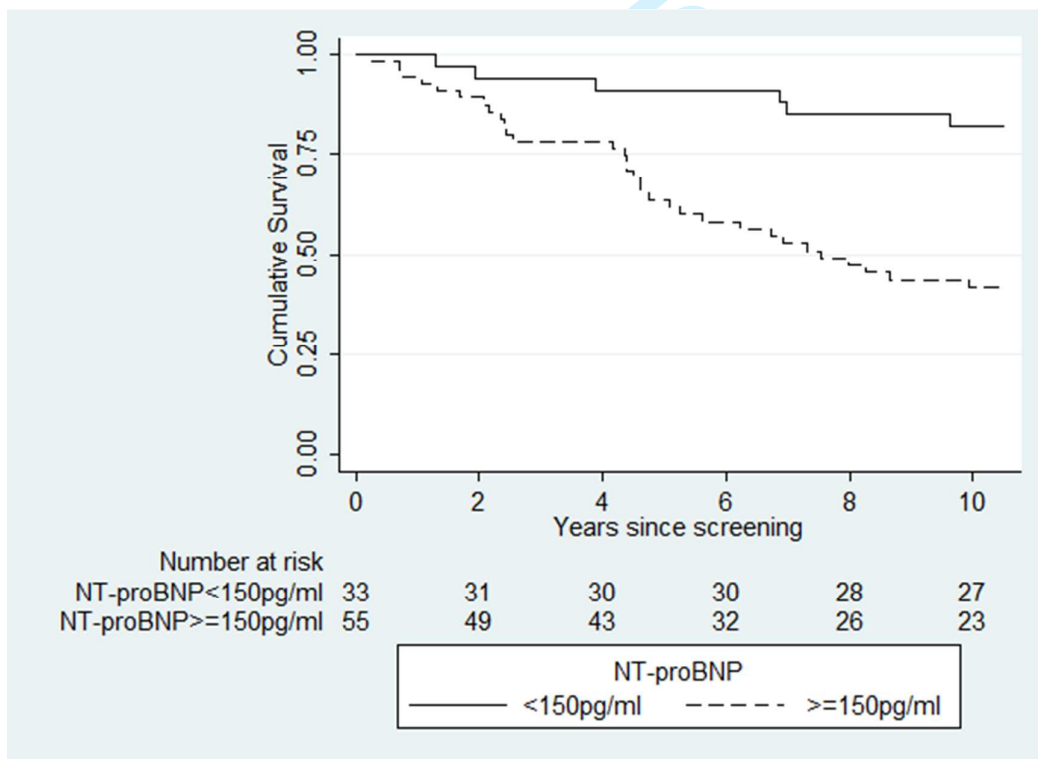

Figure 7 - Kaplan-Meier curve showing NT-proBNP level and ten year survival for the diuretic cohort.

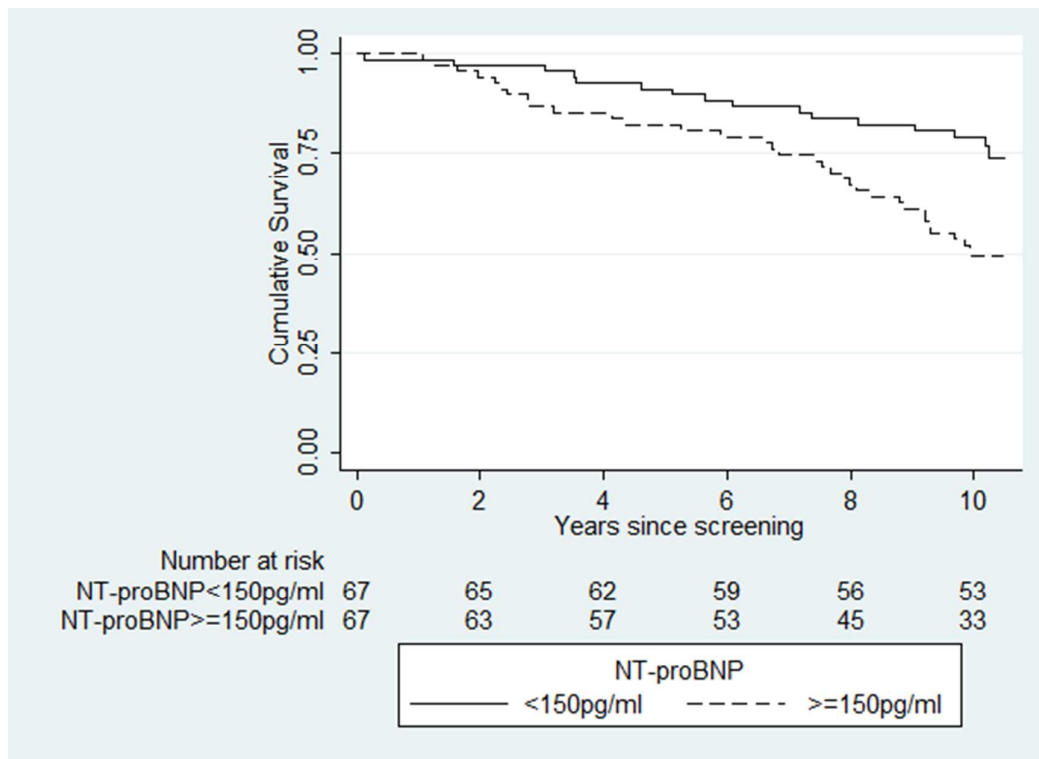

Figure 8 - Kaplan-Meier curve showing NT-proBNP level and ten year survival for the high risk cohort.

# BMJ Open

## The potential role of NT-proBNP in screening for and predicting prognosis in heart failure: a survival analysis.

|                                 |                                                                                                                                                                                                                                                                                                            |
|---------------------------------|------------------------------------------------------------------------------------------------------------------------------------------------------------------------------------------------------------------------------------------------------------------------------------------------------------|
| Journal:                        | <i>BMJ Open</i>                                                                                                                                                                                                                                                                                            |
| Manuscript ID:                  | bmjopen-2013-004675.R1                                                                                                                                                                                                                                                                                     |
| Article Type:                   | Research                                                                                                                                                                                                                                                                                                   |
| Date Submitted by the Author:   | 06-Mar-2014                                                                                                                                                                                                                                                                                                |
| Complete List of Authors:       | Taylor, Clare; University of Birmingham, Primary Care Clinical Sciences<br>Roalfe, Andrea; University of Birmingham, College of Medical and Dental Sciences<br>Iles, Rachel; University of Birmingham, Primary Care Clinical Sciences<br>Hobbs, Richard; University of Oxford, Dept of Primary Health Care |
| <b>Primary Subject Heading</b>: | Cardiovascular medicine                                                                                                                                                                                                                                                                                    |
| Secondary Subject Heading:      | Epidemiology                                                                                                                                                                                                                                                                                               |
| Keywords:                       | Cardiac Epidemiology < CARDIOLOGY, Echocardiography < CARDIOLOGY, Heart failure < CARDIOLOGY                                                                                                                                                                                                               |
|                                 |                                                                                                                                                                                                                                                                                                            |

SCHOLARONE™  
Manuscripts

1  
2  
3 **Title Page**  
4

5 **The potential role of NT-proBNP in screening for and predicting prognosis in heart**  
6 **failure: a survival analysis.**  
7

8  
9 **Taylor CJ, Roalfe AK, Iles R and Hobbs FDR**

10  
11 Dr Clare J Taylor, General Practitioner and NIHR Doctoral Research Fellow.  
12 Primary Care Clinical Sciences, University of Birmingham, Edgbaston, B15 2TT.  
13

14  
15 Mrs Andrea K Roalfe, Senior Lecturer in Medical Statistics.  
16 Primary Care Clinical Sciences, University of Birmingham, Edgbaston, B15 2TT.  
17

18  
19 Mrs Rachel Iles, Research Fellow.  
20 Primary Care Clinical Sciences, University of Birmingham, Edgbaston, B15 2TT.  
21

22  
23 Professor FD Richard Hobbs, Head of Department.  
24 Primary Care Health Sciences, University of Oxford, New Radcliffe House, Radcliffe  
25 Observatory Quarter, Walton Road, Oxford, OX21 6GG  
26 Tel: +44 (0)1865 289288  
27 E-mail: richard.hobbs@phc.ox.ac.uk (corresponding author)  
28  
29  
30  
31  
32  
33  
34  
35  
36  
37  
38  
39  
40  
41  
42  
43  
44  
45  
46  
47  
48  
49  
50  
51  
52  
53  
54  
55  
56  
57  
58  
59  
60



## **Abstract**

**Objectives:** To determine the potential role of N-terminal pro-B-type natriuretic peptide (NT-proBNP) in screening for and predicting prognosis in heart failure by examining diagnosis and survival of patients with a raised NT-proBNP at screening.

**Design:** Survival analysis.

**Setting:** Prospective sub-study of the Echocardiographic Heart of England Screening study (ECHOES) to investigate ten-year survival in participants with a NT-proBNP level at baseline.

**Participants:** 594 participants took part in the sub-study. Records of all participants in the ECHOES cohort were flagged during the screening phase which ended 25th February 1999. All deaths until 25th February 2009 were coded.

**Outcome measures:** Logistic regression was used to examine whether NT-proBNP is useful in predicting heart failure at screening after adjustment for age, sex and cohort. Kaplan-Meier curves and log rank tests were used to compare survival times of participants according to NT-proBNP level. Cox regression was carried out to assess the prognostic effect of NT-proBNP after allowing for significant covariates and receiver operator curves were used to determine test reliability.

**Results:** The risk of heart failure increased almost 18-fold when NT-proBNP was 150pg/ml or above (adjusted odds ratio=17.7, 95% CI 4.9 to 63.5). Ten-year survival in the general population cohort was 61% (95% CI 48% to 71%) for those with NT-proBNP $\geq$ 150pg/ml and 89% (95% CI 84% to 92%) for those below the cut-off at the time of the initial study. After adjustment for age, sex and risk factors for heart failure, NT-proBNP level  $\geq$  150pg/ml was associated with a 58% increase in the risk of death within 10 years (adjusted hazard ratio=1.58, 95% CI 1.09 to 2.30).

**Conclusions:** Raised NT-proBNP levels, when screening the general population, are predictive of a diagnosis of heart failure (at a lower threshold than guidelines for diagnosing symptomatic patients) and also predicted reduced survival at 10 years.

### **Keywords**

Heart failure, Prognosis, Natriuretic peptides, Screening, Diagnosis

### **Article Summary**

#### **Article focus**

To examine the role of natriuretic peptides in predicting a subsequent diagnosis of heart failure and survival over the next decade.

#### **Key messages**

1  
2  
3 In the Echocardiographic Heart of England Screening (ECHOES) study, N-terminal B  
4 type natriuretic peptide (NT-proBNP) levels above 150pg/ml were associated with  
5 both a diagnosis of heart failure at screening and reduced survival at ten years.  
6

7  
8 **Strengths and limitations of the study**

9 The ECHOES cohort represents a well-phenotyped group with accurate mortality  
10 data.  
11

12 Not all participants in the ECHOES cohort had a NT-proBNP measurement but the  
13 characteristics of the subgroup were similar to the whole cohort so are likely to be  
14 generalisable.  
15  
16  
17  
18  
19  
20  
21  
22  
23  
24  
25  
26  
27  
28  
29  
30  
31  
32  
33  
34  
35  
36  
37  
38  
39  
40  
41  
42  
43  
44  
45  
46  
47  
48  
49  
50  
51  
52  
53  
54  
55  
56  
57  
58  
59  
60

## **Manuscript**

### **Introduction**

Biomarkers can be useful in diagnosis, treatment monitoring and to inform prognosis.<sup>1 2 3</sup> B-type natriuretic peptide (BNP) and N-terminal pro-B-type natriuretic peptide (NT-proBNP) are released by the ventricles of the heart in response to volume and pressure overload. BNP relaxes vascular smooth muscle to reduce ventricular preload and acts on the kidney to increase sodium excretion and induce diuresis.<sup>4</sup> NT-proBNP is an inactive fragment of the cleaved pro-BNP molecule. Both peptides have been investigated for use in diagnosis of heart failure and left ventricular systolic dysfunction (LVSD).<sup>5 6</sup> NT-proBNP and BNP assays have been found to be equally reliable for diagnostic use.<sup>7</sup> Raised natriuretic peptide levels have consistently been associated with increased mortality in patients with heart failure.<sup>8 9</sup> There may also be a role for these assays in determining prognosis in patients with and without heart failure.<sup>10</sup>

The Echocardiographic Heart of England Screening (ECHOES) study was a large heart failure screening study carried out in central England.<sup>11</sup> All ECHOES participants underwent a detailed initial clinical assessment to screen for evidence of heart failure. Diagnosis was determined after blinded adjudication by a panel of 3 heart failure specialists using all the clinical and investigation data available from the screening. All deaths were collated from routine mortality data. We previously reported the 10-year prognosis of all patients in the ECHOES study according to presence or absence of heart failure and LVSD.<sup>12</sup> This analysis uses data from ECHOES to examine the role of NT-proBNP in predicting a diagnosis of heart failure at screening and also the relationship between NT-proBNP and survival in the following decade.

### **Methods**

The original ECHOES study screened a total of 6162 participants from sixteen practices in Central England. Four practices were randomly selected from each of the four socio-economic groups defined using the Townsend deprivation score. This resulted in a socio-economically diverse population, likely to be representative of the broader UK population. ECHOES included four separate cohorts: 3960 patients randomly sampled from the general population over age 45; 782 patients with a previous label of heart failure recorded in GP notes; 928 patients on diuretic therapy; and 1062 with known risk factors for heart disease (hypertension, diabetes, angina, history of myocardial infarction(MI)). The four cohorts were stipulated prior to the study and searches were carried out to find patients in each of these groups using general practice records. Patients underwent assessment (history, examination, electrocardiogram and echocardiography) to screen for evidence of heart failure.

A substudy involving 594 ECHOES participants was also carried out to investigate the role of NT-proBNP in diagnosis and prognosis of heart failure. Fuller methods are available in an earlier publication<sup>11</sup> but in brief, participants came from 4 general practices, across the Townsend scale; 309 were sampled from the general population, 103 with a previous label of heart failure, 88 on diuretic therapy and 134

1  
2  
3 with risk factors of heart disease with some patients belonging to more than one  
4 cohort.  
5  
6

7  
8 During the ECHOES study, which ran from March 1995 to February 1999, the records  
9 of all participants were flagged by the Office for National Statistics (ONS) Central  
10 Register Office. The ONS has provided details of the date and cause of death for all  
11 ECHOES participants since then. The final participant in the original ECHOES cohort  
12 was screened on 25<sup>th</sup> February 1999 and all deaths up to the 25th February 2009 had  
13 been notified to the research team. This allowed an estimate of 10-year prognosis  
14 for patients in ECHOES including those from the NT-proBNP study. All data from the  
15 original ECHOES cohort were recorded in a restricted access database. The statistical  
16 packages SPSS and Stata 10 were used to analyse the data.  
17  
18

### 19 20 *Analytical methods*

21 Area under the receiver operating curve (AUROC) was calculated, for each cohort, to  
22 measure the natriuretic peptide's performance in predicting heart failure at  
23 screening. Multiple logistic regression was then performed, using all cohorts  
24 combined, to examine whether BNP was predictive of heart failure, after adjustment  
25 for the sampling structure and other significant predictors. Variables in the final  
26 model were selected using the backward elimination method with significance level  
27 set at 0.05.  
28  
29

30 Variables considered in the analysis included NT-proBNP, age, sex, body mass index  
31 (BMI), smoking status, blood pressure, individual risk factors for heart failure  
32 (hypertension, angina, MI, diabetes), symptoms (tiredness, shortness of breath,  
33 ankle oedema), prescribed drugs (beta-blockers, ace inhibitors, angiotensin receptor  
34 blockers (ARBs) and diuretics); and whether a previous label of heart failure was  
35 recoded. Two-way interactions with natriuretic peptide were also considered. The  
36 cohort-related variables were kept in the final model to allow for the sampling  
37 structure. To improve the precision of the estimates, bootstrapped confidence  
38 intervals for odds ratios were calculated using 1000 replications.  
39  
40  
41

42 Survival analysis was carried out, by each cohort, using Kaplan-Meier curves to  
43 demonstrate survival in those with an NT-proBNP level  $\geq 150$ pg/ml. Log rank tests  
44 were used to compare survival between the different groups. The mean survival  
45 times were calculated rather than median since data was censored for more than  
46 50% of cases. Estimation of the mean is limited to the largest survival time if data  
47 were censored.  
48  
49

50 Cox regression was then undertaken, using all 594 participants, to assess the  
51 prognostic ability of NT-proBNP after allowing for each cohort and other covariates.  
52 Variables entered into the starting model are as described previously with the  
53 addition of atrial fibrillation, ejection fraction and significant valve disease. Fractional  
54 polynomials were considered when comparing models of best fit for continuous  
55 variables of age, BMI and blood pressure. The proportional hazards assumption was  
56 tested using Schoenfeld residuals.  
57  
58  
59  
60

## Results

NT-proBNP levels were measured in 594 participants during the ECHOES study. A heart failure diagnosis was confirmed for 7 (8%) of those in the general population sample; 36 (35%) of those with a previous label of heart failure; 15 (17%) of those on diuretics; and 9 (7%) of those at high risk. Twenty three (43%) of all those with a heart failure diagnosis had an ejection fraction of less than 40% and an additional 10 persons (19%) had ejection fraction of between 40 and 49%.

The baseline characteristics of all participants in the sub-study, broken down by cohort and NT-proBNP 150pg/ml cut-off, are shown in Table 1. Those in the upper NT-proBNP category were older, had more cardiovascular risk factors and took more medication than those below 150pg/ml. They also, with exception of those from the cohort with previous label of heart failure, had more symptoms of heart failure.

The distributions of NT-proBNP in each cohort are given in Table 2. The general population had the lowest values with more than 75% below 150pg/ml. Highest levels were observed in the cohort with a previous label of heart failure.

TABLE 1

TABLE 2

Figures 1 to 4 show the Receiver Operating Curves for assessing the performance of NT-proBNP in diagnosing heart failure in each of the cohorts. The area under the receiver operating curve (AUROC) for NT-proBNP levels above 150 pg/ml was 0.95 (95%CI 0.88 to 1.00) for the general population; 0.83 (0.75 to 0.91) for those with previous label of HF; 0.91(0.82 to 1.00) for those on diuretics; and 0.88 (0.80 to 0.97 for those at risk of heart failure]. The cut-off for NT-proBNP at 150pg/ml had sensitivity of 100% (95% CI 59.0% to 100%) and specificity of 79.5% (95%CI 74.5% to 83.9%) in identifying heart failure in the general population sample; [97.2%(85.5% to 99.9%) sensitivity and 29.9%(19.3% to 42.3%) specificity for those with previous label of HF; 93.3%(68.1% to 99.8%) sensitivity and 43.8%(32.2% to 55.9%) specificity for those on diuretics; and 100%(66.4% to 100%) sensitivity and 53.6%(44.5% to 62.6%) specificity for those at high risk]. A full summary of performance characteristics, including positive and negative predictive values and accuracy, is given in Table 3. Other cut-offs were not considered in this analysis due to the high sensitivity and reasonable specificity observed using the chosen cut-off. Overall, a cut-off of 150pg/ml found 100% of heart failure cases and 80% of non-heart failure cases. The percentage of deaths at 10 years with NT-proBNP  $\geq$ 150pg/ml at baseline was 50% in the general population, 86% in HF label group, 71% in the high risk group and 84% in the diuretics group.

FIGURES 1 TO 4

Table 3

1  
2  
3 The multiple logistic regression analysis suggests that NT-proBNP $\geq$ 150pg/ml is  
4 predictive of heart failure (OR=17.7 (95%CI 4.9 to 63.5)) after allowing for cohort  
5 related variables (Table 4).  
6

7  
8 TABLE 4

9  
10 *Cause of death*

11 Cardiovascular disease was the main cause of death in each cohort, ranging from  
12 31% (95%CI 20% to 46%) in the general population to 49% (95% CI 37% to 61%) in  
13 the high risk group. The remaining deaths were mainly due to respiratory disease  
14 and cancer.  
15

16  
17 *Survival analysis of the general population cohort*

18 There was a statistically significant difference in survival between those who had an  
19 NT-proBNP level  $\geq$  150pg/ml and those with an NT-proBNP level  $<$ 150pg/ml in the  
20 general population sample (log-rank test,  $\chi^2 = 30.4, 1, P < 0.0001$ ) as shown in Figure 5.  
21 Mean survival for those with an NT-proBNP  $\geq$  150pg/ml was 8.7 years (95%CI 8.0 to  
22 9.4) compared to 9.9 years (95%CI 9.7 to 10.2) for those with an NT-proBNP  
23  $<$ 150pg/ml. Ten-year survival was 61% (95%CI 48% to 71%) for those with a NT-  
24 proBNP  $\geq$  150pg/ml and 89% (95%CI 84% to 92%) for those with NT-proBNP  
25  $<$ 150pg/ml at the time of the initial study.  
26  
27

28  
29 FIGURE 5

30  
31  
32 *Survival analysis of the other cohorts*

33 Reduced length of survival was also observed for those above the NT-proBNP cut-off  
34 when compared with those below the cut-off in each of the other cohorts ( $p < 0.001$ ).  
35 Those sampled with a previous label of heart failure and with NT-proBNP  $\geq$   
36 150pg/ml had a mean survival of 5.8 years (95%CI 5.0 to 6.5) compared to 8.4 years  
37 (95%CI 7.1 to 9.7) for those below the cut-off (figure 6). The comparative results for  
38 those on diuretics (Figure 7) were 7.0 years (6.0 to 7.9) vs 9.5 years (8.7 to 10.4); and  
39 those at high risk (Figure 8) 8.3 years (7.6 to 9.0) vs. 9.4 years (8.8 to 10.0).  
40  
41  
42

43  
44 FIGURE 6-8

45  
46 *Cox regression analysis of all cohort data*

47 Table 5 shows a cox regression model examining factors associated with mortality  
48 using data from all 4 cohorts. After adjustment for demographic variables and  
49 shortness of breath, NT-proBNP  $\geq$ 150pg/ml was found to increase the risk of death  
50 by 58% (HR=1.58 (1.09 to 2.30)).  
51

52  
53 Table5

## Discussion

### *Summary of main findings*

594 participants of the ECHOES study took part in the NT-proBNP substudy. Mean survival time for participants from the general population with an NT-proBNP  $\geq$  150pg/ml was over one year less than participants with NT-proBNP  $<$  150pg/ml (8.7 vs 9.9 years). The proportion of patients surviving ten years was significantly lower in the group with an NT-proBNP level  $\geq$  150pg/ml compared to an NT-proBNP level  $<$  150pg/ml (61% vs 89% respectively in the general population). An NT-proBNP level  $\geq$  150pg/ml was strongly predictive of a diagnosis of heart failure at screening and of death in the next ten years.

### *Strengths and limitations of the study*

The ECHOES study represents a unique cohort of patients with well phenotyped heart failure from a community setting. The rigor of clinical assessment means the diagnosis of heart failure is accurate. All participants notes were flagged by ONS to ensure accurate data about date and cause of death were sent to the research team. The ONS records reflect the reason for death in the opinion of the attending clinician, as recorded on the death certificate, but the symptoms of heart failure can be similar to other conditions, particularly respiratory disorders, and clinicians can disagree. The study design also did not allow for interim data collection so non-fatal end points, such as hospitalisation, were not explored.

NT-proBNP levels were not recorded in all participants of the ECHOES study however the baseline characteristics of the NT-proBNP substudy were similar to those of the study population as a whole. Only 3% of participants were non-white which may not fully reflect the ethnic diversity of the UK population and NT-proBNP levels may vary depending on ethnicity. Renal function was not recorded in this study therefore we were unable to assess the effect of renal impairment on mortality.<sup>13</sup> A cut off of 150pg/ml was chosen to represent a raised level of NT-proBNP in the substudy however debate exists around the optimal cut off level for NT-proBNP.<sup>14</sup>

The study reports a long term follow-up of ten years and over this time both the diagnostic criteria and management of heart failure have changed significantly. The original diagnosis of heart failure in the ECHOES study was based on the European Society of Cardiology guideline 1995 and this definition has been updated several times since then.<sup>15 16 21</sup> At the time, heart failure with reduced ejection fraction was the main recognised type of heart failure and the most common precursor to this was, and remains, ischaemic heart disease. Sixty nine per cent of the heart failure labelled group in this study had a history of angina or MI. In the past 10-15 years, heart failure with preserved ejection fraction, or HF-PEF, has also been recognised as distinct clinical and pathological entity. The atrial fibrillation and/or significant valve disease groups (with normal ejection fraction) in the ECHOES study may have partly captured some HFPEF patients but this group will have largely been excluded. The ECHOES-extension study has rescreened the entire cohort, phenotyping for both HF-REF and HF-PEF, and will report shortly.

### *Comparison with existing literature*

A study by Wang et al investigated the relationship between BNP levels and risk of cardiovascular events or death in 3346 patients from the Framingham cohort who did not have heart failure at baseline.<sup>8</sup> 119 participants died and 79 had a first cardiovascular event during a mean follow-up of 5.2 years. For each one standard deviation increment increase in log BNP level, risk of developing heart failure increased by 77% ( $p < 0.001$ ) and risk of death increased by 27% ( $p = 0.009$ ).

BNP and NT-proBNP levels also increase with heart failure stage. A study of patients over the age of 45 from the Rochester Epidemiology Study found that mean BNP (rather than NT-proBNP) level was 26pg/ml in patients without heart failure, 32pg/ml in those with risk factors, 53pg/ml in those asymptomatic participants with structural or functional cardiac abnormalities, 137pg/ml in participants with heart failure symptoms and 353pg/ml for participants with severe heart failure. Survival declined progressively for each additional stage of disease.<sup>17</sup>

Another study by Hartmann et al investigated the role of baseline NT-proBNP in predicting mortality and hospitalisation in patients with a diagnosis of heart failure.<sup>9</sup> NT-proBNP levels were recorded in 814 men and 197 women with severe heart failure defined as breathlessness at rest or on minimal exertion and an ejection fraction of less than 25%. They were followed up for a median time of 159 days (range 1-488 days). A baseline NT-proBNP level above compared to below the median level for the cohort was a strong predictor of all-cause mortality and hospitalisation for heart failure (relative risk 2.4; 95%CI 1.8-3.4;  $p = 0.0001$ ). NT-proBNP has also been found to be an independent predictor of mortality in patients with renal disease.<sup>10</sup>

Overall, participants labelled with heart failure in the ECHOES cohort had a better prognosis than some other community based studies.<sup>18 19</sup> This may reflect a lower overall risk in the studied population, the introduction of medication known to improve survival, such as ACE inhibitors or B blockers, following screening or a referral bias in that patients in the study may have been more likely to be referred for more intensive heart failure management. A letter was sent to GPs of all study participants with advice on management for participants with a confirmed diagnosis of heart failure.

### *Implications of future research and practice*

In this substudy, participants with a raised NT-proBNP level were more likely to have a confirmed diagnosis of heart failure after screening. Natriuretic peptides are already used in clinical practice to determine the likelihood of heart failure and guide referral for echocardiography however the optimal cut-off level is still unclear.<sup>20 21</sup> The National Institute for Health and Clinical Excellence (NICE) clinical guideline on the management of chronic heart failure recommends an NT-proBNP of 400 pg/ml is used as the threshold to refer for echocardiography in symptomatic patients, whereas the European Society of Cardiology suggest a threshold level of 125 pg/ml to exclude heart failure. Fuat et al showed that a cut-off of 150 pg/ml had a negative predictive value of 92% in a primary care community heart failure clinic, again in



1  
2  
3 symptomatic patients.<sup>22</sup> Our data suggest that the current NICE cut-off is too high  
4 and that 150 pg/ml is a more reliable threshold for further investigation, especially  
5 since our data includes asymptomatic as well as symptomatic non-presenting  
6 patients.  
7

8  
9 Importantly, participants in the NT-proBNP substudy with a raised NT-proBNP were  
10 also more likely to die sooner than participants with a normal NT-proBNP level.  
11 These data confirm the potential for incident NT-proBNP tests to indicate patient  
12 prognosis in primary care settings as has been confirmed in hospital settings.  
13 Assessment of patients to establish the cause of a raised NT-proBNP level such as  
14 heart failure or renal disease followed by optimal management using evidence based  
15 therapies is crucial to reducing mortality in these high risk patients.  
16

17  
18 Finally, these data are the first we are aware of that suggest a possible role for  
19 natriuretic peptides in population screening for heart failure. Given the late  
20 diagnosis in many patients and the asymptomatic nature in early stages, this may be  
21 an important finding.  
22

23  
24 **Authors' contributions:** F.D.R.H. was principal investigator and established the  
25 ECHOES cohort. C.J.T. and F.D.R.H. designed this study. C.J.T. and A.K.R. undertook  
26 statistical analysis. C.J.T. and R.I. coded the death data. All authors contributed to  
27 the manuscript.  
28

29  
30 **Acknowledgements:** We would like to acknowledge Dr Michael Davies and Dr  
31 Russell Davis for their contribution to the original ECHOES study from which these  
32 10-year follow-up data are derived.  
33

34  
35 **Ethical approval:** The study received full ethical approval from the local research  
36 ethics committee.  
37

38  
39 **Funding:** The costs for this analysis were partially supported by the NIHR School for  
40 Primary Care Research. The National Health Service Research and Development  
41 Cardiovascular Disease and Stroke Programme funded the original  
42 Echocardiographic Heart of England Screening Study. CT is funded by a Doctoral  
43 Research Fellowship from the National Institute for Health Research. The views  
44 expressed are those of the author(s) and not necessarily those of the NHS, the NIHR  
45 or the Department of Health.  
46

47  
48 **Competing interests:** All authors have completed the ICMJE uniform disclosure form  
49 at [www.icmje.org/coi\\_disclosure.pdf](http://www.icmje.org/coi_disclosure.pdf) and declare: The NT-proBNP assays for the  
50 ECHOES study were provided free of charge by Roche Diagnostics, but Roche were  
51 not party to the study design, nor any aspect of the analysis, nor to the write up of  
52 this paper. FDRH has received similar indirect research support on other investigator  
53 led heart failure research. FDRH has also received occasional fees or expense  
54 reimbursement from Roche in the past; no other relationships or activities that could  
55 appear to have influenced the submitted work.  
56  
57  
58  
59  
60

1  
2  
3 **Copyright license:** The Corresponding Author has the right to grant on behalf of all  
4 authors and does grant on behalf of all authors, a worldwide licence to the  
5 Publishers and its licensees in perpetuity, in all forms, formats and media (whether  
6 known now or created in the future), to i) publish, reproduce, distribute, display and  
7 store the Contribution, ii) translate the Contribution into other languages, create  
8 adaptations, reprints, include within collections and create summaries, extracts  
9 and/or, abstracts of the Contribution, iii) create any other derivative work(s) based  
10 on the Contribution, iv) to exploit all subsidiary rights in the Contribution, v) the  
11 inclusion of electronic links from the Contribution to third party material where-ever  
12 it may be located; and, vi) licence any third party to do any or all of the above.  
13  
14

15  
16 **Data sharing:** The complete database for the ECHOES study is stored securely at the  
17 University of Birmingham and available on request. All authors have access to the  
18 data.  
19  
20  
21  
22  
23  
24  
25  
26  
27  
28  
29  
30  
31  
32  
33  
34  
35  
36  
37  
38  
39  
40  
41  
42  
43  
44  
45  
46  
47  
48  
49  
50  
51  
52  
53  
54  
55  
56  
57  
58  
59  
60

## Tables

| Characteristics                                   | General population<br>(n=309)      |                                 | Previous label of HF (n=103)      |                                 | On diuretics<br>(n=88)           |                                 | High risk<br>(n=134)              |                                 |
|---------------------------------------------------|------------------------------------|---------------------------------|-----------------------------------|---------------------------------|----------------------------------|---------------------------------|-----------------------------------|---------------------------------|
|                                                   | NTproBNP<br>< 150 pg/ml<br>(n=240) | NTproBNP<br>≥150pg/ml<br>(n=69) | NTproBNP<br>< 150 pg/ml<br>(n=21) | NTproBNP<br>≥150pg/ml<br>(n=82) | NTproBNP<br>< 150pg/ml<br>(n=33) | NTproBNP<br>≥150pg/ml<br>(n=55) | NTproBNP<br>< 150 pg/ml<br>(n=67) | NTproBNP<br>≥150pg/ml<br>(n=67) |
| <b>Demographics</b>                               |                                    |                                 |                                   |                                 |                                  |                                 |                                   |                                 |
| Age at screening<br>[mean (sd) years]             | 59.6 (8.7)                         | 71.7 (9.7)                      | 72.2 (9.6)                        | 74.7 (8.4)                      | 63.2 (8.8)                       | 74.1 (9.8)                      | 63.2 (8.7)                        | 70.4 (8.2)                      |
| Gender, male                                      | 130 (54)                           | 31 (45)                         | 9 (43)                            | 47 (57)                         | 24 (73)                          | 26 (47)                         | 43 (64)                           | 33 (49)                         |
| Ever Smoked                                       | 137 (57)                           | 37 (54)                         | 17 (81)                           | 45 (55)                         | 21 (64)                          | 32 (58)                         | 42 (63)                           | 48 (72)                         |
| Body mass index<br>[mean (sd) kg/m <sup>2</sup> ] | 27.0 (4.9)                         | 25.8 (3.8)                      | 31.1 (8.5)                        | 26.6 (4.4)                      | 27.9 (3.5)                       | 26.8 (4.5)                      | 28.4 (4.1)                        | 27.1 (3.8)                      |
| Systolic BP<br>[mean(sd)mm/Hg]                    | 149.3 (20.9)                       | 156.1 (23.3)                    | 162.9(18.3)                       | 149.2(26.3)                     | 161.7(22.6)                      | 154.8 (25.2)                    | 155.2 (18.3)                      | 158.7 (23.4)                    |
| Diastolic BP<br>[mean(sd)mm/Hg]                   | 85.6 (10.9)                        | 83.6 (9.9)                      | 84.4 (9.5)                        | 78.0 (12.6)                     | 91.7 (10.3)                      | 82.4 (14.2)                     | 83.9 (10.1)                       | 83.6 (11.7)                     |
| <b>History</b>                                    |                                    |                                 |                                   |                                 |                                  |                                 |                                   |                                 |
| Diabetes                                          | 9 (4)                              | 6 (9)                           | 4 (19)                            | 14 (17)                         | 3 (9)                            | 8 (15)                          | 24 (36)                           | 12 (18)                         |
| Myocardial<br>Infarction                          | 5 (2)                              | 7 (10)                          | 4 (19)                            | 26 (32)                         | 2 (6)                            | 8 (15)                          | 16 (24)                           | 36 (54)                         |
| Angina                                            | 12 (5)                             | 16 (23)                         | 7 (33)                            | 33 (40)                         | 3 (9)                            | 14 (25)                         | 23 (34)                           | 46 (69)                         |
| Hypertension                                      | 54 (22)                            | 24 (35)                         | 9 (43)                            | 27 (33)                         | 29 (88)                          | 31 (56)                         | 38 (57)                           | 39 (58)                         |
| <b>Medication taken</b>                           |                                    |                                 |                                   |                                 |                                  |                                 |                                   |                                 |
| Diuretics                                         | 15 (6)                             | 20 (29)                         | 16 (76)                           | 70 (85)                         | 33 (100)                         | 55 (100)                        | 12 (18)                           | 26 (39)                         |
| Ace Inhibitors                                    | 12 (5)                             | 5 (7)                           | 4 (19)                            | 39 (48)                         | 10 (30)                          | 20 (36)                         | 19 (28)                           | 18 (27)                         |
| ARBs                                              | 3 (1)                              | 0 (0)                           | 1 (5)                             | 7 (9)                           | 0 (0)                            | 1 (2)                           | 2 (3)                             | 0 (0)                           |

|                                         |            |         |         |         |         |         |         |         |
|-----------------------------------------|------------|---------|---------|---------|---------|---------|---------|---------|
| Beta-blockers                           | 14 (6)     | 19 (28) | 2 (10)  | 9 (11)  | 5 (15)  | 8 (15)  | 17 (25) | 21 (31) |
| <b>Symptoms</b>                         |            |         |         |         |         |         |         |         |
| Shortness of breath                     | 48 (20)    | 32 (46) | 16 (76) | 61 (74) | 11 (33) | 34 (62) | 17 (25) | 44 (66) |
| Tired                                   | 70 (29)    | 33 (48) | 15 (71) | 62 (75) | 12 (36) | 35 (64) | 27 (40) | 42 (63) |
| Ankle swelling                          | 38 (16)    | 22 (32) | 15 (71) | 41 (50) | 10 (30) | 29 (53) | 22 (33) | 22 (33) |
| <b>New York Heart Association class</b> |            |         |         |         |         |         |         |         |
| 1                                       | 200 (83)   | 39 (57) | 5 (24)  | 22 (27) | 23 (70) | 21 (38) | 57 (78) | 28 (42) |
| 2                                       | 35 (15)    | 23 (33) | 11 (52) | 30 (37) | 7 (21)  | 21 (38) | 10 (15) | 29 (43) |
| 3                                       | 4 (2)      | 2 (3)   | 3 (14)  | 15 (18) | 3 (9)   | 8 (15)  | 1 (1)   | 6 (9)   |
| 4                                       | 1 (0.4)    | 5 (7)   | 2 (10)  | 15 (18) | 0 (0)   | 5 (9)   | 4 (6)   | 4 (6)   |
| <b>Ejection fraction</b>                |            |         |         |         |         |         |         |         |
| <40%                                    | 1 (0.4)    | 4 (6)   | 1 (5)   | 20 (24) | 1 (3)   | 6 (11)  | 1 (1)   | 9 (13)  |
| 40-49%                                  | 2 (0.8)    | 3 (4)   | 2 (10)  | 18 (22) | 1 (3)   | 6 (11)  | 3 (4)   | 6 (9)   |
| >=50%                                   | 237 (98.7) | 62 (90) | 18 (86) | 44 (54) | 31 (94) | 43 (78) | 63 (94) | 52 (78) |
| <b>Diagnosis</b>                        |            |         |         |         |         |         |         |         |
| Definite heart failure                  | 0 (0)      | 7 (10)  | 1 (5)   | 35 (43) | 1 (3)   | 14 (25) | 0 (0)   | 9 (13)  |
| Atrial fibrillation                     | 0 (0)      | 7 (10)  | 0 (0)   | 23 (28) | 0 (0)   | 13 (24) | 0 (0)   | 3 (4)   |
| Significant valve disease               | 0 (0)      | 5 (7)   | 1 (5)   | 9 (11)  | 0 (0)   | 7 (13)  | 0 (0)   | 3 (4)   |

Table 1 – Baseline characteristics of patients in the ECHOES NT-proBNP sub-study

| Cohort               | N   | Median (IQR)          |
|----------------------|-----|-----------------------|
| General population   | 309 | 70.9 (35.3 to 130.1)  |
| Previous label of HF | 103 | 493.6 (204.3 to 1341) |
| On diuretics         | 88  | 200 (76.1 to 672.8)   |
| At high risk         | 134 | 160.1 (64.6 to 386.3) |

Table 2 Distribution of NT-proBNP in each cohort

| Cohort                          | AUROC               | Sensitivity         | Specificity         | Positive predictive value (PPV) | Negative predictive value (NPV) | Accuracy            |
|---------------------------------|---------------------|---------------------|---------------------|---------------------------------|---------------------------------|---------------------|
| General population              | 0.95 (0.88 to 1.00) | 100 (59 to 100)     | 79.5 (74.5 to 83.9) | 10.1 (4.2 to 19.8)              | 100 (98.5 to 100)               | 79.9 (75 to 84.3)   |
| Previous label of heart failure | 0.83 (0.75 to 0.91) | 97.2 (85.5 to 99.9) | 29.9 (19.3 to 42.3) | 42.7 (31.8 to 54.1)             | 95.2 (76.2 to 99.9)             | 53.4 (43.3 to 63.3) |
| On diuretics                    | 0.91 (0.82 to 1.00) | 93.3 (68.1 to 99.8) | 43.8 (32.2 to 55.9) | 25.5 (14.7 to 39.0)             | 97.0 (84.2 to 99.9)             | 52.3 (41.4 to 63.0) |
| High risk                       | 0.88 (0.80 to 0.97) | 100 (66.4 to 100)   | 53.6 (44.5 to 62.6) | 13.4 (6.3 to 24.0)              | 100 (94.6 to 100)               | 56.7 (47.9 to 65.2) |

AUROC: Area under the receiver operating curve

Table 3 Performance characteristics for NT-proBNP (cut-off 150pg/ml)

| Variable              | Odds Ratio (95% confidence interval*) | P value |
|-----------------------|---------------------------------------|---------|
| Previous label of HF  | 3.74 (1.45 to 9.69)                   | 0.007   |
| On diuretics          | 5.26 (1.70 to 16.31)                  | 0.004   |
| Diabetes              | 4.91 (1.66 to 14.51)                  | 0.004   |
| Hypertension          | 0.39 (0.16 to 0.97)                   | 0.04    |
| Angina                | 1.22 (0.99 to 5.00)                   | 0.053   |
| Myocardial infarction | 1.61 (0.67 to 3.86)                   | 0.29    |

1  
2  
3  
4  
5  
6  
7  
8  
9  
10  
11  
12  
13  
14  
15  
16  
17  
18  
19  
20  
21  
22  
23  
24  
25  
26  
27  
28  
29  
30  
31  
32  
33  
34  
35  
36  
37  
38  
39  
40  
41  
42  
43  
44  
45  
46  
47  
48  
49  
50  
51  
52  
53  
54  
55  
56  
57  
58  
59  
60

|                            |                       |        |
|----------------------------|-----------------------|--------|
| NT-proBNP $\geq$ 150 pg/ml | 17.65 (4.91 to 63.48) | <0.001 |
|----------------------------|-----------------------|--------|

\*Bootstrapped estimates

Table 4 Logistic regression model to predict heart failure

For peer review only

| Variable                   | Hazard Ratio (95% confidence interval*) | P value |
|----------------------------|-----------------------------------------|---------|
| Age                        | 1.10 (1.08 to 1.10)                     | <0.001  |
| Male sex                   | 2.05 (1.43 to 2.95)                     | <0.001  |
| Previous label of HF       | 1.75 (1.17 to 2.57)                     | 0.007   |
| On diuretics               | 0.90 (0.62 to 1.32)                     | 0.59    |
| Diabetes                   | 1.08 (0.65 to 1.88)                     | 0.78    |
| Hypertension               | 1.37 (0.99 to 1.90)                     | 0.06    |
| Angina                     | 1.04 (0.73 to 1.50)                     | 0.82    |
| Myocardial infarction      | 1.18 (0.80 to 1.73)                     | 0.40    |
| Shortness of breath        | 1.64 (1.14 to 2.37)                     | 0.008   |
| NT-proBNP $\geq$ 150 pg/ml | 1.58 (1.09 to 2.30)                     | 0.02    |

\*Bootstrapped estimates

Table 5 Cox regression model of factors associated with mortality (including all study cohorts)

## References

<sup>1</sup> de Lemos JA, McGuire DK, Drazner MH. B-type natriuretic peptide in cardiovascular disease. *Lancet* 2003;362(9380):316-22

<sup>2</sup> Escobar c, Santiago-Ruiz JL, Manzano L. Diagnosis of heart failure in elderly patients: a clinical challenge. *Eur J Heart Fail* (2011) 13(10): 1152

<sup>3</sup> Ahmad T and O'Connor C. Therapeutic implications of biomarkers in chronic heart failure *Clin Pharmacol Ther.* 2013 Oct;94(4):468-79. doi: 10.1038/clpt.2013.139. Epub 2013 Jul 15

<sup>4</sup> Mark DB, Felker GM. B-type natriuretic peptide - a biomarker for all seasons? *New England Journal of Medicine* 2004;350(7):718-20.

<sup>5</sup> Cowie MR, Struthers AD, Wood DA, Coats AJS, Thompson SG, Poole-Wilson PA, Sutton GC. Value of natriuretic peptides in assessment of patients with possible new heart failure in primary care. *Lancet* 1997;350:1347-51

<sup>6</sup> Mant J, Doust J, Roalfe A, et al. Systematic review and individual patient data meta-analysis of diagnosis of heart failure, with modelling of implications of different diagnostic strategies in primary care. *Health Technol Assess* 2009;13(32)

<sup>7</sup> Hobbs FD, Davis RC, Roalfe AK, et al. Reliability of N-terminal proBNP assay in diagnosis of left ventricular systolic dysfunction within representative and high risk populations. *Heart* 2004;90(8):866-70.

- 1  
2  
3  
4<sup>8</sup> Wang TJ, Larson MG, Levy D, et al. Plasma natriuretic peptide levels and the risk of cardiovascular events and death. *New England Journal of Medicine* 2004;350(7):655-63
- 5  
6  
7  
8<sup>9</sup> Hartmann F, Packer M, Coats AJ, et al. Prognostic impact of plasma N-terminal pro-brain natriuretic peptide in severe chronic congestive heart failure: a substudy of the Carvedilol Prospective Randomized Cumulative Survival (COPERNICUS) trial. *Circulation* 2004;110(13):1780-6
- 9  
10  
11  
12<sup>10</sup> Svensson M, Gorst-Rasmussen A, Schmidt EB et al. NT-pro-BNP is an independent predictor of mortality in patients with end-stage renal disease. *Clin Nephrol* 2009;71(4): 380-6
- 13  
14  
15  
16<sup>11</sup> Davies M, Hobbs F, Davis R, et al. Prevalence of left-ventricular systolic dysfunction and heart failure in the Echocardiographic Heart of England Screening study: a population based study. *Lancet* 2001;358(9280):439-44.
- 17  
18  
19  
20<sup>12</sup> Taylor CJ, Roalfe AK, Iles R and Hobbs FDR. Ten-year prognosis of heart failure in the community: follow-up data from the Echocardiographic Heart fo England Screening (ECHOES) study. *Eur J Heart Fail* 2012;14(2): 176-184
- 21  
22  
23  
24<sup>13</sup> Brandimarte F, Vaduganathan M, Mureddu GF, et al. Prognostic implications of renal dysfunction in patients hospitalised with heart failure: data from the last decade of clinical investigations. *Heart Fail Rev* 2013;18(2):167-76
- 25  
26  
27  
28<sup>14</sup> Januzzi JL, Chen-Tournoux AA and Moe G. Amino-Terminal Pro-B-Type Natriuretic Peptide Testing for the Diagnosis or Exclusion of Heart Failure in Patients with Acute Symptoms. *Am J Cardiol* 2008;101[suppl]:29A-38A
- 29  
30  
31  
32<sup>15</sup> Guidelines for the diagnosis of heart failure. The Task Force on Heart Failure of the European Society of Cardiology. *Eur Heart J* 1995 Jun;16(6):741-51
- 33  
34  
35  
36  
37  
38  
39  
40  
41  
42  
43  
44  
45  
46  
47  
48  
49  
50  
51  
52  
53  
54  
55  
56  
57  
58  
59  
60
- 16 European Society of Cardiology, Heart Failure Association of the ESC (HFA), European Society of Intensive Care Medicine (ESICM), Dickstein K, Cohen-Solal A, Filippatos G, et al. ESC guidelines for the diagnosis and treatment of acute and chronic heart failure 2008: the Task Force for the diagnosis and treatment of acute and chronic heart failure 2008 of the European Society of Cardiology. Developed in collaboration with the Heart Failure Association of the ESC (HFA) and endorsed by the European Society of Intensive Care Medicine (ESICM). *European Journal of Heart Failure* 2008 Oct;10(10):933-89
- 17 Ammar KA, Jacobsen SJ, Mahoney DW, et al. Prevalence and prognostic significance of heart failure stages: application of the American College of Cardiology/American Heart Association heart failure staging criteria in the community. *Circulation* 2007;115(12):1563-70.
- 18 Levy D, Kenchaiah S, Larson MG, et al. Long-term trends in the incidence of and survival with heart failure. *New England Journal of Medicine* 2002 Oct 31;347(18):1397-402
- 19 Roger VL, Weston SA, Redfield MM, et al. Trends in heart failure incidence and survival in a community-based population. *JAMA* 2004 Jul 21;292(3):344-50
- 20 National Institute of Health and Clinical Excellence. Chronic Heart Failure. Management of chronic heart failure in adults in primary and secondary care. NICE 2010



1  
2  
3  
4  
5  
6  
7  
8  
9  
10  
11  
12  
13  
14  
15  
16  
17  
18  
19  
20  
21  
22  
23  
24  
25  
26  
27  
28  
29  
30  
31  
32  
33  
34  
35  
36  
37  
38  
39  
40  
41  
42  
43  
44  
45  
46  
47  
48  
49  
50  
51  
52  
53  
54  
55  
56  
57  
58  
59  
60

---

<sup>21</sup> European Society of Cardiology guidelines for the diagnosis and treatment of acute and chronic heart failure 2012. *European Heart Journal* 2012;33:1787–1847  
doi:10.1093/eurheartj/ehs104

<sup>22</sup> Fuat A, Murphy JJ, Hungin AP, et al. The diagnostic accuracy and utility of a B-type natriuretic peptide test in a community population of patients with suspected heart failure. *Br J Gen Pract* 2006;56(526):327-33

For peer review only

1  
2  
3  
4  
5  
6 **Title Page**  
7

8 **The potential role of NT-proBNP in screening for and predicting prognosis in heart**  
9 **failure: a survival analysis.**  
10

11 **Taylor CJ, Roalfe AK, Iles R and Hobbs FDR**  
12

13 Dr Clare J Taylor, General Practitioner and NIHR Doctoral Research Fellow.  
14 Primary Care Clinical Sciences, University of Birmingham, Edgbaston, B15 2TT.  
15

16 Mrs Andrea K Roalfe, Senior Lecturer in Medical Statistics.  
17 Primary Care Clinical Sciences, University of Birmingham, Edgbaston, B15 2TT.  
18

19 Mrs Rachel Iles, Research Fellow.  
20 Primary Care Clinical Sciences, University of Birmingham, Edgbaston, B15 2TT.  
21

22 Professor FD Richard Hobbs, Head of Department.  
23 Primary Care Health Sciences, University of Oxford, New Radcliffe House, Radcliffe  
24 Observatory Quarter, Walton Road, Oxford, OX21 6GG  
25 Tel: +44 (0)1865 289288  
26 E-mail: richard.hobbs@phc.ox.ac.uk (corresponding author)  
27  
28  
29  
30  
31  
32  
33  
34  
35  
36  
37  
38  
39  
40  
41  
42  
43  
44  
45  
46  
47  
48  
49  
50  
51  
52  
53  
54  
55  
56  
57  
58  
59  
60

## **Abstract**

**Objectives:** To determine the potential role of N-terminal [pro-B-type](#) natriuretic peptide (NT-proBNP) in screening for and predicting prognosis in heart failure by examining diagnosis and survival of patients with a raised NT-proBNP at screening.

**Design:** Survival analysis.

**Setting:** Prospective sub-study of the Echocardiographic Heart of England Screening study (ECHOES) to investigate ten-year survival in participants with a NT-proBNP level at baseline.

**Participants:** 594 participants took part in the sub-study. Records of all participants in the ECHOES cohort were flagged during the screening phase which ended 25th February 1999. All deaths until 25th February 2009 were coded.

**Outcome measures:** Logistic regression was used to examine whether [NT-proBNP](#) is useful in predicting heart failure at screening after adjustment for age, sex and cohort. Kaplan-Meier curves and log rank tests were used to compare survival times of participants according to NT-proBNP level. Cox regression was carried out to assess the prognostic effect of [NT-proBNP](#) after allowing for significant covariates and receiver operator curves were used to determine test reliability.

**Results:** The risk of heart failure increased almost 18-fold when NT-proBNP was 150pg/ml or above (adjusted odds ratio=17.7, 95% CI 4.9 to 63.5). Ten-year survival in the general population cohort was 61% (95% CI 48% to 71%) for those with NT-proBNP $\geq$ 150pg/ml and 89% (95% CI 84% to 92%) for those below the cut-off at the time of the initial study. After adjustment for age, sex and risk factors for heart failure, NT-proBNP level  $\geq$  150pg/ml was associated with a 58% increase in the risk of death within 10 years (adjusted hazard ratio=1.58, 95% CI 1.09 to 2.30).

**Conclusions:** Raised NT-proBNP levels, when screening the general population, are predictive of a diagnosis of heart failure (at a lower threshold than guidelines for diagnosing symptomatic patients) and also predicted reduced survival at 10 years.

### **Keywords**

Heart failure, Prognosis, Natriuretic peptides, Screening, Diagnosis

### **Article Summary**

#### **Article focus**

To examine the role of natriuretic peptides in predicting a subsequent diagnosis of heart failure and survival over the next decade.

#### **Key messages**

1  
2  
3  
4  
5  
6 In the Echocardiographic Heart of England Screening (ECHOES) study, N-terminal B  
7 type natriuretic peptide (NT-proBNP) levels above 150pg/ml were associated with  
8 both a diagnosis of heart failure at screening and reduced survival at ten years.  
9

10 **Strengths and limitations of the study**

11 The ECHOES cohort represents a well-phenotyped group with accurate mortality  
12 data.  
13

14 Not all participants in the ECHOES cohort had a NT-proBNP measurement but the  
15 characteristics of the subgroup were similar to the whole cohort so are likely to be  
16 generalisable.  
17  
18  
19  
20  
21  
22  
23  
24  
25  
26  
27  
28  
29  
30  
31  
32  
33  
34  
35  
36  
37  
38  
39  
40  
41  
42  
43  
44  
45  
46  
47  
48  
49  
50  
51  
52  
53  
54  
55  
56  
57  
58  
59  
60

## Manuscript

### Introduction

Biomarkers can be useful in diagnosis, treatment monitoring and to inform prognosis.<sup>1 2 3</sup> B-type natriuretic peptide (BNP) and N-terminal pro-B-type natriuretic peptide (NT-proBNP) are released by the ventricles of the heart in response to volume and pressure overload. BNP relaxes vascular smooth muscle to reduce ventricular preload and acts on the kidney to increase sodium excretion and induce diuresis.<sup>4</sup> NT-proBNP is an inactive fragment of the cleaved pro-BNP molecule. Both peptides have been investigated for use in diagnosis of heart failure and left ventricular systolic dysfunction (LVSD).<sup>5 6</sup> NT-pro-BNP and BNP assays have been found to be equally reliable for diagnostic use.<sup>7</sup> Raised natriuretic peptide levels have consistently been associated with increased mortality in patients with heart failure.<sup>8 9</sup> There may also be a role for these assays in determining prognosis in patients with and without heart failure.<sup>10</sup>

The Echocardiographic Heart of England Screening (ECHOES) study was a large heart failure screening study carried out in central England.<sup>11</sup> All ECHOES participants underwent a detailed initial clinical assessment to screen for evidence of heart failure. Diagnosis was determined after blinded adjudication by a panel of 3 heart failure specialists using all the clinical and investigation data available from the screening. All deaths were collated from routine mortality data. We previously reported the 10-year prognosis of all patients in the ECHOES study according to presence or absence of heart failure and LVSD.<sup>12</sup> This analysis uses data from ECHOES to examine the role of NT-proBNP in predicting a diagnosis of heart failure at screening and also the relationship between NT-proBNP and survival in the following decade.

### Methods

The original ECHOES study screened a total of 6162 participants from sixteen practices in Central England. Four practices were randomly selected from each of the four socio-economic groups defined using the Townsend deprivation score. This resulted in a socio-economically diverse population, likely to be representative of the broader UK population. ECHOES included four separate cohorts: 3960 patients randomly sampled from the general population over age 45; 782 patients with a previous label of heart failure recorded in GP notes; 928 patients on diuretic therapy; and 1062 with known risk factors for heart disease (hypertension, diabetes, angina, history of myocardial infarction (MI)). [The four cohorts were stipulated prior to the study and searches were carried out to find patients in each of these groups using general practice records.](#) Patients underwent assessment (history, examination, electrocardiogram and echocardiography) to screen for evidence of heart failure.

A substudy involving 594 ECHOES participants was also carried out to investigate the role of NT-proBNP in diagnosis and prognosis of heart failure. Fuller methods are available in an earlier publication<sup>9 11 14</sup> but in brief, participants came from 4 general practices, across the Townsend scale; 309 were sampled from the general population, 103 with a previous label of heart failure, 88 on diuretic therapy and 134

Formatted: Superscript

with risk factors of heart disease with some patients belonging to more than one cohort.

During the ECHOES study, which ran from March 1995 to February 1999, the records of all participants were flagged by the Office for National Statistics (ONS) Central Register Office. The ONS has provided details of the date and cause of death for all ECHOES participants since then. The final participant in the original ECHOES cohort was screened on 25<sup>th</sup> February 1999 and all deaths up to the 25th February 2009 had been notified to the research team. This allowed an estimate of 10-year prognosis for patients in ECHOES including those from the NT-proBNP study. All data from the original ECHOES cohort were recorded in a restricted access database. The statistical packages SPSS and Stata 10 were used to analyse the data.

#### *Analytical methods*

Area under the receiver operating curves (AUROC) was calculated, for each cohort, to measure the natriuretic peptide's performance in predicting heart failure at screening. Multiple logistic regression was then performed, using all cohorts combined, to examine whether BNP was predictive of heart failure, after adjustment for the sampling structure and other significant predictors. Variables in the final model were selected using the backward elimination method with significance level set at 0.05.

Variables considered in the analysis included NT-proBNP, age, sex, body mass index (BMI), smoking status, blood pressure, individual risk factors for heart failure (hypertension, angina, MI, diabetes), symptoms (tiredness, shortness of breath, ankle oedema), prescribed drugs (beta-blockers, ace inhibitors, [angiotensin receptor blockers \(ARBs\)](#) and diuretics); and whether a previous label of heart failure was recoded. Two-way interactions with natriuretic peptide were also considered. The cohort-related variables were kept in the final model to allow for the sampling structure. To improve the precision of the estimates, bootstrapped confidence intervals for odds ratios were calculated using 1000 replications.

Survival analysis was carried out, by each cohort, using Kaplan-Meier curves to demonstrate survival in those with an NT-proBNP level  $\geq 150$ pg/ml. Log rank tests were used to compare survival between the different groups. The mean survival times were calculated rather than median since data was censored for more than 50% of cases. Estimation of the mean is limited to the largest survival time if data were censored.

Cox regression was then undertaken, using all 594 participants, to assess the prognostic ability of NT-proBNP after allowing for each cohort and other covariates. Variables entered into the starting model are as described previously with the addition of atrial fibrillation, ejection fraction and significant valve disease. Fractional polynomials were considered when comparing models of best fit for continuous variables of age, BMI and blood pressure. The proportional hazards assumption was tested using Schoenfeld residuals.

## Results

NT-proBNP levels were measured in 594 participants during the ECHOES study. A heart failure diagnosis was confirmed for 7 (8%) of those in the general population sample; 36 (35%) of those with a previous label of heart failure; 15 (17%) of those on diuretics; and 9 (7%) of those at high risk. Twenty three (43%) of all those with a heart failure diagnosis had an ejection fraction of less than 40% and an additional 10 persons (19%) had ejection fraction of between 40 and 49%.

The baseline characteristics of all participants in the sub-study, broken down by cohort and NT-proBNP 150pg/ml cut-off, are shown in [Table 1](#). Those in the upper NT-proBNP category were older, had more cardiovascular risk factors and took more medication than those below 150pg/ml. They also, with exception of those from the cohort with previous label of heart failure, had more symptoms of heart failure.

The distributions of NT-proBNP in each cohort are given in [Table 2](#). The general population had the lowest values with more than 75% below 150pg/ml. Highest levels were observed in the cohort with a previous label of heart failure.

TABLE 1

TABLE 2

Figures 1 to 4 show the Receiver Operating Curves for assessing the performance of NT-proBNP in diagnosing heart failure in each of the cohorts. The area under the receiver operating curve (AUROC) for NT-proBNP levels above 150 pg/ml was 0.95 (95%CI 0.88 to 1.00) for the general population; 0.83 (0.75 to 0.91) for those with previous label of HF; 0.91(0.82 to 1.00) for those on diuretics; and 0.88 (0.80 to 0.97 for those at risk of heart failure]. The cut-off for NT-proBNP at 150pg/ml had sensitivity of 100% (95% CI 59.0% to 100%) and specificity of 79.5% (95%CI 74.5% to 83.9%) in identifying heart failure in the general population sample; [97.2%(85.5% to 99.9%) sensitivity and 29.9%(19.3% to 42.3%) specificity for those with previous label of HF; 93.3%(68.1% to 99.8%) sensitivity and 43.8%(32.2% to 55.9%) specificity for those on diuretics; and 100%(66.4% to 100%) sensitivity and 53.6%(44.5% to 62.6%) specificity for those at high risk]. [A full summary of performance characteristics, including positive and negative predictive values and accuracy, is given in Table 3.](#) -Other cut-offs were not considered in this analysis due to the high sensitivity and reasonable specificity observed using the chosen cut-off. Overall, a cut-off of 150pg/ml found 100% of heart failure cases and 80% of non-heart failure cases. The percentage of deaths at 10 years with NT-proBNP  $\geq$ 150pg/ml at baseline was 50% in the general population, 86% in HF label group, 71% in the high risk group and 84% in the diuretics group.

FIGURES 1 TO 4

[Table 3](#)

The multiple logistic regression analysis suggests that [NT-proBNP](#)  $\geq 150$  pg/ml is predictive of heart failure (OR=17.7 (95%CI 4.9 to 63.5)) after allowing for cohort related variables (Table [34](#)).

TABLE [34](#)

#### *Cause of death*

Cardiovascular disease was the main cause of death in each cohort, ranging from 31% (95%CI 20% to 46%) in the general population to 49% (95% CI 37% to 61%) in the high risk group. The remaining deaths were mainly due to respiratory disease and cancer.

#### *Survival analysis of the general population cohort*

There was a statistically significant difference in survival between those who had an NT-proBNP level  $\geq 150$  pg/ml and those with an NT-proBNP level  $< 150$  pg/ml in the general population sample (log-rank test,  $\chi^2 = 30.4$ , 1,  $P < 0.0001$ ) as shown in [figure 5](#). Mean survival for those with an NT-proBNP  $\geq 150$  pg/ml was 8.7 years (95%CI 8.0 to 9.4) compared to 9.9 years (95%CI 9.7 to 10.2) for those with an NT-proBNP  $< 150$  pg/ml. Ten-year survival was 61% (95%CI 48% to 71%) for those with a NT-proBNP  $\geq 150$  pg/ml and 89% (95%CI 84% to 92%) for those with NT-proBNP  $< 150$  pg/ml at the time of the initial study.

FIGURE 5

#### *Survival analysis of the other cohorts*

Reduced length of survival was also observed for those above the NT-proBNP cut-off when compared with those below the cut-off in each of the other cohorts ( $p < 0.001$ ). Those sampled with a previous label of [HF](#) heart failure and with NT-proBNP  $\geq 150$  pg/ml had a mean survival of 5.8 years (95%CI 5.0 to 6.5) compared to 8.4 years (95%CI 7.1 to 9.7) for those below the cut-off (figure 6). The comparative results for those on diuretics ([figure 7](#)) were 7.0 years (6.0 to 7.9) vs 9.5 years (8.7 to 10.4); and those at high risk ([figure 8](#)) 8.3 years (7.6 to 9.0) vs. 9.4 years (8.8 to 10.0).

FIGURE 6-8

#### *Cox regression analysis of all cohort data*

[Table 5 shows a cox regression model examining factors associated with mortality using data from all 4 cohorts.](#) After adjustment for demographic variables [and](#) shortness of breath, [and](#) NT-proBNP  $\geq 150$  pg/ml was found to increase the risk of death by 58% (HR=1.58 (1.09 to 2.30)).

Table [45](#)



## Discussion

### *Summary of main findings*

594 participants of the ECHOES study took part in the NT-proBNP substudy. Mean survival time for participants from the general population with an NT-proBNP  $\geq$  150pg/ml was over one year less than participants with NT-proBNP  $<$  150pg/ml (8.7 vs 9.9 years). The proportion of patients surviving ten years was significantly lower in the group with an NT-proBNP level  $\geq$  150pg/ml compared to an NT-proBNP level  $<$  150pg/ml (61% vs 89% respectively in the general population). An NT-proBNP level  $\geq$  150pg/ml was strongly predictive of a diagnosis of heart failure at screening and of death in the next ten years.

### *Strengths and limitations of the study*

The ECHOES study represents a unique cohort of patients with well phenotyped heart failure from a community setting. The rigor of clinical assessment means the diagnosis of heart failure is accurate. All participants notes were flagged by ONS to ensure accurate data about date and cause of death were sent to the research team.

[The ONS records reflect the reason for death in the opinion of the attending clinician, as recorded on the death certificate, but the symptoms of heart failure can be similar to other conditions, particularly respiratory disorders, and clinicians can disagree. The study design also did not allow for interim data collection so non-fatal end points, such as hospitalisation, were not explored.](#)

NT-proBNP levels were not recorded in all participants of the ECHOES study however the baseline characteristics of the NT-proBNP substudy were similar to those of the study population as a whole. Only 3% of participants were non-white which may not [accurately-fully](#) reflect the ethnic diversity of the UK population and NT-proBNP levels may vary depending on ethnicity. Renal function was not recorded in this study therefore we were unable to assess the effect of renal impairment on mortality.<sup>13</sup> A cut off of 150pgm/ml was chosen to represent a raised level of NT-proBNP in the substudy however debate exists around the optimal cut off level for NT-proBNP.<sup>14</sup>

[The study reports a long term follow-up of ten years and over this time both the diagnostic criteria and management of heart failure have changed significantly. The original diagnosis of heart failure in the ECHOES study was based on the European Society of Cardiology guideline 1995 and this definition has been updated several times since then.<sup>15 16 2117</sup> At the time, heart failure with reduced ejection fraction was the main recognised type of heart failure and the most common precursor to this was, and remains, ischaemic heart disease. Sixty nine per cent of the heart failure labelled group in this study had a history of angina or MI. In the past 10-15 years, heart failure with preserved ejection fraction, or HF-PEF, has also been recognised as distinct clinical and pathological entity. The atrial fibrillation and/or significant valve disease groups \(with normal ejection fraction\) in the ECHOES study may have partly captured some HFPEF patients but this group will have largely been excluded. The ECHOES-extension study has rescreened the entire cohort, phenotyping for both HF-REF and HF-PEF, and will report shortly.](#)

### Comparison with existing literature

A study by Wang et al investigated the relationship between BNP levels and risk of cardiovascular events or death in 3346 patients from the Framingham cohort who did not have heart failure at baseline.<sup>85</sup> 119 participants died and 79 had a first cardiovascular event during a mean follow-up of 5.2 years. For each one standard deviation increment increase in log BNP level, risk of developing heart failure increased by 77% ( $p < 0.001$ ) and risk of death increased by 27% ( $p = 0.009$ ).

Formatted: Endnote Reference

BNP and NT-proBNP levels also increase with heart failure stage. A study of patients over the age of 45 from the Rochester Epidemiology Study found that mean BNP (rather than NT-proBNP) level was 26pg/ml in patients without heart failure, 32pg/ml in those with risk factors, 53pg/ml in those asymptomatic participants with structural or functional cardiac abnormalities, 137pg/ml in participants with heart failure symptoms and 353pg/ml for participants with severe heart failure. Survival declined progressively for each additional stage of disease.<sup>17</sup>

Another study by Hartmann et al investigated the role of baseline NT-proBNP in predicting mortality and hospitalisation in patients with a diagnosis of heart failure.<sup>96</sup> NT-proBNP levels were recorded in 814 men and 197 women with severe heart failure defined as breathlessness at rest or on minimal exertion and an ejection fraction of less than 25%. They were followed up for a median time of 159 days (range 1-488 days). A baseline NT-proBNP level above compared to below the median level for the cohort was a strong predictor of all-cause mortality and hospitalisation for heart failure (relative risk 2.4; 95%CI 1.8-3.4;  $p = 0.0001$ ). NT-proBNP has also been found to be an independent predictor of mortality in patients with renal disease.<sup>107</sup>

Formatted: Endnote Reference

Overall, participants labelled with heart failure in the ECHOES cohort had a better prognosis than some other community based studies.<sup>18 19</sup> This may reflect a lower overall risk in the studied population, the introduction of medication known to improve survival, such as ACE inhibitors or B blockers, following screening or a referral bias in that patients in the study may have been more likely to be referred for more intensive heart failure management. A letter was sent to GPs of all study participants with advice on management for participants with a confirmed diagnosis of heart failure.

Formatted: Endnote Reference

### Implications of future research and practice

In this substudy, participants with a raised NT-proBNP level were more likely to have a confirmed diagnosis of heart failure after screening. Natriuretic peptides are already used in clinical practice to determine the likelihood of heart failure and guide referral for echocardiography however the optimal cut-off level is still unclear.<sup>20 21</sup> The National Institute for Health and Clinical Excellence (NICE) clinical guideline on the management of chronic heart failure recommends an NT-proBNP of 400 pg/ml is used as the threshold to refer for echocardiography in symptomatic patients, whereas the European Society of Cardiology suggest a threshold level of 125 pg/ml to exclude heart failure. Fuat et al showed that a cut-off of 150 pg/ml had a negative

1  
2  
3  
4  
5  
6 predictive value of 92% in a primary care community heart failure clinic, again in  
7 symptomatic patients.<sup>22</sup> Our data suggest that the current NICE cut-off is too high  
8 and that 150 pg/ml is a more reliable threshold for further investigation, especially  
9 since our data includes asymptomatic as well as symptomatic non-presenting  
10 patients.

11  
12 Importantly, participants in the NT-proBNP substudy with a raised NT-proBNP were  
13 also more likely to die sooner than participants with a normal NT-proBNP level.  
14 These data confirm the potential for incident NT-proBNP tests to indicate patient  
15 prognosis in primary care settings as has been confirmed in hospital settings.  
16 Assessment of patients to establish the cause of a raised NT-proBNP level such as  
17 heart failure or renal disease followed by optimal management using evidence based  
18 therapies is crucial to reducing mortality in these high risk patients.

19  
20 Finally, these data are the first we are aware of that suggest a possible role for  
21 natriuretic peptides in population screening for heart failure. Given the late  
22 diagnosis in many patients and the asymptomatic nature in early stages, this may be  
23 an important finding.

24  
25 **Authors' contributions:** F.D.R.H. was principal investigator and established the  
26 ECHOES cohort. C.J.T. and F.D.R.H. designed this study. C.J.T. and A.K.R. undertook  
27 statistical analysis. C.J.T. and R.I. coded the death data. All authors contributed to  
28 the manuscript.

29  
30 **Acknowledgements:** We would like to acknowledge Dr Michael Davies and Dr  
31 Russell Davis for their contribution to the original ECHOES study from which these  
32 10-year follow-up data are derived.

33  
34 **Ethical approval:** The study received full ethical approval from the local research  
35 ethics committee.

36  
37 **Funding:** The costs for this analysis were partially supported by the NIHR School for  
38 Primary Care Research. The National Health Service Research and Development  
39 Cardiovascular Disease and Stroke Programme funded the original  
40 Echocardiographic Heart of England Screening Study. CT is funded by a Doctoral  
41 Research Fellowship from the National Institute for Health Research. [The views](#)  
42 [expressed are those of the author\(s\) and not necessarily those of the NHS, the NIHR](#)  
43 [or the Department of Health.](#)

44  
45  
46  
47  
48 **Competing interests:** All authors have completed the ICMJE uniform disclosure form  
49 at [www.icmje.org/coi\\_disclosure.pdf](http://www.icmje.org/coi_disclosure.pdf) and declare: The NT-proBNP assays for the  
50 ECHOES study were provided free of charge by Roche Diagnostics, but Roche were  
51 not party to the study design, nor any aspect of the analysis, nor to the write up of  
52 this paper. FDRH has received similar indirect research support on other investigator  
53 led heart failure research. FDRH has also received occasional fees or expense  
54

Formatted: Font: Calibri, 12 pt

1  
2  
3  
4  
5  
6 reimbursement from Roche in the past; no other relationships or activities that could  
7 appear to have influenced the submitted work.  
8

9  
10 **Copyright license:** The Corresponding Author has the right to grant on behalf of all  
11 authors and does grant on behalf of all authors, a worldwide licence to the  
12 Publishers and its licensees in perpetuity, in all forms, formats and media (whether  
13 known now or created in the future), to i) publish, reproduce, distribute, display and  
14 store the Contribution, ii) translate the Contribution into other languages, create  
15 adaptations, reprints, include within collections and create summaries, extracts  
16 and/or, abstracts of the Contribution, iii) create any other derivative work(s) based  
17 on the Contribution, iv) to exploit all subsidiary rights in the Contribution, v) the  
18 inclusion of electronic links from the Contribution to third party material where-ever  
19 it may be located; and, vi) licence any third party to do any or all of the above.  
20  
21  
22  
23  
24  
25  
26  
27  
28  
29  
30  
31  
32  
33  
34  
35  
36  
37  
38  
39  
40  
41  
42  
43  
44  
45  
46  
47  
48  
49  
50  
51  
52  
53  
54  
55  
56  
57  
58  
59  
60

## Tables

| Characteristics                                | General population (n=309)   |                           | Previous label of HF (n=103) |                                           | On diuretics (n=88)                      |                           | High risk (n=134)           |                           |
|------------------------------------------------|------------------------------|---------------------------|------------------------------|-------------------------------------------|------------------------------------------|---------------------------|-----------------------------|---------------------------|
|                                                | NTproBNP < 150 pg/ml (n=240) | NTproBNP ≥150pg/ml (n=69) | NTproBNP < 150 pg/ml (n=21)  | NTproBNP ≥150pg/ml (n=82)                 | NTproBNP < 150pg/ml (n=33)               | NTproBNP ≥150pg/ml (n=55) | NTproBNP < 150 pg/ml (n=67) | NTproBNP ≥150pg/ml (n=67) |
| <b>Demographics</b>                            |                              |                           |                              |                                           |                                          |                           |                             |                           |
| Age at screening [mean (sd) years]             | 59.6 (8.7)                   | 71.7 (9.7)                | 72.2 (9.6)                   | 74.7 (8.4)                                | 63.2 (8.8)                               | 74.1 (9.8)                | 63.2 (8.7)                  | 70.4 (8.2)                |
| Gender, male                                   | 130 (54)                     | 31 (45)                   | 9 (43)                       | 47 (57)                                   | 24 (73)                                  | 26 (47)                   | 43 (64)                     | 33 (49)                   |
| Ever Smoked                                    | 137 (57)                     | 37 (54)                   | 17 (81)                      | 45 (55)                                   | 21 (64)                                  | 32 (58)                   | 42 (63)                     | 48 (72)                   |
| Body mass index [mean (sd) kg/m <sup>2</sup> ] | 27.0 (4.9)                   | 25.8 (3.8)                | 31.1 (8.5)                   | 26.6 (4.4)                                | 27.9 (3.5)                               | 26.8 (4.5)                | 28.4 (4.1)                  | 27.1 (3.8)                |
| Systolic BP [mean(sd)mm/Hg]                    | 149.3 (20.9)                 | 156.1 (23.3)              | 162.9(18.3)                  | 149.2(26.3)                               | 161.7(22.6)                              | 154.8 (25.2)              | 155.2 (18.3)                | 158.7 (23.4)              |
| Diastolic BP [mean(sd)mm/Hg]                   | 85.6 (10.9)                  | 83.6 (9.9)                | 84.4 (9.5)                   | 78.0 (12.6)                               | 91.7 (10.3)                              | 82.4 (14.2)               | 83.9 (10.1)                 | 83.6 (11.7)               |
| <b>History</b>                                 |                              |                           |                              |                                           |                                          |                           |                             |                           |
| Diabetes                                       | 9 (4)                        | 6 (9)                     | 4 (19)                       | 14 (17)                                   | 3 (9)                                    | 8 (15)                    | 24 (36)                     | 12 (18)                   |
| Myocardial Infarction                          | 5 (2)                        | 7 (10)                    | 4 (19)                       | 26 (32)                                   | 2 (6)                                    | 8 (15)                    | 16 (24)                     | 36 (54)                   |
| Angina                                         | 12 (5)                       | 16 (23)                   | 7 (33)                       | 33 (40)                                   | 3 (9)                                    | 14 (25)                   | 23 (34)                     | 46 (69)                   |
| Hypertension                                   | 54 (22)                      | 24 (35)                   | 9 (43)                       | 27 (33)                                   | 29 (88)                                  | 31 (56)                   | 38 (57)                     | 39 (58)                   |
| <b>Medication taken</b>                        |                              |                           |                              |                                           |                                          |                           |                             |                           |
| Diuretics                                      | 15 (6)                       | 20 (29)                   | 16 (76)                      | <del>70</del> 17<br>( <del>85</del> 8521) | <del>33</del> 22<br>( <del>100</del> 67) | <del>55</del> 3 (100)96   | 12 (18)                     | 26 (39)                   |
| Ace Inhibitors                                 | 12 (5)                       | 5 (7)                     | 4 (19)                       | 39 (48)                                   | 10 (30)                                  | 20 (36)                   | 19 (28)                     | 18 (27)                   |

|                                         |            |         |         |         |         |         |         |         |
|-----------------------------------------|------------|---------|---------|---------|---------|---------|---------|---------|
| ARBs                                    | 3 (1)      | 0 (0)   | 1 (5)   | 7 (9)   | 0 (0)   | 1 (2)   | 2 (3)   | 0 (0)   |
| Beta-blockers                           | 14 (6)     | 19 (28) | 2 (10)  | 9 (11)  | 5 (15)  | 8 (15)  | 17 (25) | 21 (31) |
| <b>Symptoms</b>                         |            |         |         |         |         |         |         |         |
| Shortness of breath                     | 48 (20)    | 32 (46) | 16 (76) | 61 (74) | 11 (33) | 34 (62) | 17 (25) | 44 (66) |
| Tired                                   | 70 (29)    | 33 (48) | 15 (71) | 62 (75) | 12 (36) | 35 (64) | 27 (40) | 42 (63) |
| Ankle swelling                          | 38 (16)    | 22 (32) | 15 (71) | 41 (50) | 10 (30) | 29 (53) | 22 (33) | 22 (33) |
| <b>New York Heart Association class</b> |            |         |         |         |         |         |         |         |
| 1                                       | 200 (83)   | 39 (57) | 5 (24)  | 22 (27) | 23 (70) | 21 (38) | 57 (78) | 28 (42) |
| 2                                       | 35 (15)    | 23 (33) | 11 (52) | 30 (37) | 7 (21)  | 21 (38) | 10 (15) | 29 (43) |
| 3                                       | 4 (2)      | 2 (3)   | 3 (14)  | 15 (18) | 3 (9)   | 8 (15)  | 1 (1)   | 6 (9)   |
| 4                                       | 1 (0.4)    | 5 (7)   | 2 (10)  | 15 (18) | 0 (0)   | 5 (9)   | 4 (6)   | 4 (6)   |
| <b>Ejection fraction</b>                |            |         |         |         |         |         |         |         |
| <40%                                    | 1 (0.4)    | 4 (6)   | 1 (5)   | 20 (24) | 1 (3)   | 6 (11)  | 1 (1)   | 9 (13)  |
| 40-49%                                  | 2 (0.8)    | 3 (4)   | 2 (10)  | 18 (22) | 1 (3)   | 6 (11)  | 3 (4)   | 6 (9)   |
| >=50%                                   | 237 (98.7) | 62 (90) | 18 (86) | 44 (54) | 31 (94) | 43 (78) | 63 (94) | 52 (78) |
| <b>Diagnosis</b>                        |            |         |         |         |         |         |         |         |
| Definite heart failure                  | 0 (0)      | 7 (10)  | 1 (5)   | 35 (43) | 1 (3)   | 14 (25) | 0 (0)   | 9 (13)  |
| Atrial fibrillation                     | 0 (0)      | 7 (10)  | 0 (0)   | 23 (28) | 0 (0)   | 13 (24) | 0 (0)   | 3 (4)   |
| Significant valve disease               | 0 (0)      | 5 (7)   | 1 (5)   | 9 (11)  | 0 (0)   | 7 (13)  | 0 (0)   | 3 (4)   |

Table 1 – Baseline characteristics of patients in the ECHOES NT-proBNP sub-study

1  
2  
3  
4  
5  
6  
7  
8  
9  
10  
11  
12  
13  
14  
15  
16  
17  
18  
19  
20  
21  
22  
23  
24  
25  
26  
27  
28  
29  
30  
31  
32  
33  
34  
35  
36  
37  
38  
39  
40  
41  
42  
43  
44  
45  
46  
47  
48  
49  
50  
51  
52  
53  
54  
55  
56  
57  
58  
59  
60

| Cohort               | N   | Median (IQR)          |
|----------------------|-----|-----------------------|
| General population   | 309 | 70.9 (35.3 to 130.1)  |
| Previous label of HF | 103 | 493.6 (204.3 to 1341) |
| On diuretics         | 88  | 200 (76.1 to 672.8)   |
| At high risk         | 134 | 160.1 (64.6 to 386.3) |

Formatted Table  
Formatted: Centered  
Formatted: Centered  
Formatted: Centered  
Formatted: Centered  
Formatted: Centered

Table 2 Distribution of NT-proBNP in each cohort

| Cohort                          | AUROC               | Sensitivity         | Specificity         | Positive predictive value (PPV) | Negative predictive value (NPV) | Accuracy            |
|---------------------------------|---------------------|---------------------|---------------------|---------------------------------|---------------------------------|---------------------|
| General population              | 0.95 (0.88 to 1.00) | 100 (59 to 100)     | 79.5 (74.5 to 83.9) | 10.1 (4.2 to 19.8)              | 100 (98.5 to 100)               | 79.9 (75 to 84.3)   |
| Previous label of heart failure | 0.83 (0.75 to 0.91) | 97.2 (85.5 to 99.9) | 29.9 (19.3 to 42.3) | 42.7 (31.8 to 54.1)             | 95.2 (76.2 to 99.9)             | 53.4 (43.3 to 63.3) |
| On diuretics                    | 0.91 (0.82 to 1.00) | 93.3 (68.1 to 99.8) | 43.8 (32.2 to 55.9) | 25.5 (14.7 to 39.0)             | 97.0 (84.2 to 99.9)             | 52.3 (41.4 to 63.0) |
| High risk                       | 0.88 (0.80 to 0.97) | 100 (66.4 to 100)   | 53.6 (44.5 to 62.6) | 13.4 (6.3 to 24.0)              | 100 (94.6 to 100)               | 56.7 (47.9 to 65.2) |

AUROC: Area under the receiver operating curve

Formatted: Font: 12 pt  
Formatted: Font: Calibri, 12 pt

Table 3 Performance characteristics for NT-proBNP (cut-off 150pg/ml)

| Variable              | Odds Ratio (95% confidence interval*) | P value |
|-----------------------|---------------------------------------|---------|
| Previous label of HF  | 3.74 (1.45 to 9.69)                   | 0.007   |
| On diuretics          | 5.26 (1.70 to 16.31)                  | 0.004   |
| Diabetes              | 4.91 (1.66 to 14.51)                  | 0.004   |
| Hypertension          | 0.39 (0.16 to 0.97)                   | 0.04    |
| Angina                | 1.22 (0.99 to 5.00)                   | 0.053   |
| Myocardial infarction | 1.61 (0.67 to 3.86)                   | 0.29    |

1  
2  
3  
4  
5  
6  
7  
8  
9  
10  
11  
12  
13  
14  
15  
16  
17  
18  
19  
20  
21  
22  
23  
24  
25  
26  
27  
28  
29  
30  
31  
32  
33  
34  
35  
36  
37  
38  
39  
40  
41  
42  
43  
44  
45  
46  
47  
48  
49  
50  
51  
52  
53  
54  
55  
56  
57  
58  
59  
60

|                            |                       |        |
|----------------------------|-----------------------|--------|
| NT-proBNP $\geq$ 150 pg/ml | 17.65 (4.91 to 63.48) | <0.001 |
|----------------------------|-----------------------|--------|

\*Bootstrapped estimates

Table 34 Logistic regression model to predict heart failure

For peer review only



| Variable                   | Hazard Ratio (95% confidence interval*) | P value |
|----------------------------|-----------------------------------------|---------|
| Age                        | 1.10 (1.08 to 1.10)                     | <0.001  |
| Male Sex                   | 2.05 (1.43 to 2.95)                     | <0.001  |
| Previous label of HF       | 1.75 (1.17 to 2.57)                     | 0.007   |
| On diuretics               | 0.90 (0.62 to 1.32)                     | 0.59    |
| Diabetes                   | 1.08 (0.65 to 1.88)                     | 0.78    |
| Hypertension               | 1.37 (0.99 to 1.90)                     | 0.06    |
| Angina                     | 1.04 (0.73 to 1.50)                     | 0.82    |
| Myocardial infarction      | 1.18 (0.80 to 1.73)                     | 0.40    |
| Shortness of breath        | 1.64 (1.14 to 2.37)                     | 0.008   |
| NT-proBNP $\geq$ 150 pg/ml | 1.58 (1.09 to 2.30)                     | 0.02    |

\*Bootstrapped estimates

Table 45 Cox regression model of factors associated with mortality ([including all study cohorts](#))

## References

- <sup>1</sup> de Lemos JA, McGuire DK, Drazner MH. B-type natriuretic peptide in cardiovascular disease. *Lancet* 2003;362(9380):316-22
- <sup>2</sup> Escobar c, Santiago-Ruiz JL, Manzano L. Diagnosis of heart failure in elderly patients: a clinical challenge. *Eur J Heart Fail* (2011) 13(10): 1152
- <sup>3</sup> Ahmad T and O'Connor C. Therapeutic implications of biomarkers in chronic heart failure *Clin Pharmacol Ther.* 2013 Oct;94(4):468-79. doi: 10.1038/clpt.2013.139. Epub 2013 Jul 15
- <sup>4</sup> Mark DB, Felker GM. B-type natriuretic peptide - a biomarker for all seasons? *New England Journal of Medicine* 2004;350(7):718-20.
- <sup>5</sup> Cowie MR, Struthers AD, Wood DA, Coats AJS, Thompson SG, Poole-Wilson PA, Sutton GC. Value of natriuretic peptides in assessment of patients with possible new heart failure in primary care. *Lancet* 1997;350:1347-51
- <sup>6</sup> Mant J, Doust J, Roalfe A, Barton P, Cowie M R, Glasziou P. Systematic review and individual patient data meta-analysis of diagnosis of heart failure, with modelling of implications of different diagnostic strategies in primary care. *Health Technol Assess* 2009;13(32)

<sup>7</sup> Hobbs FD, Davis RC, Roalfe AK, Hare R, Davies MK. Reliability of N-terminal proBNP assay in diagnosis of left ventricular systolic dysfunction within representative and high risk populations. *Heart* 2004;90(8):866-70.

<sup>8</sup> Wang TJ, Larson MG, Levy D, Benjamin EJ, Leip EP, Omland T, et al. Plasma natriuretic peptide levels and the risk of cardiovascular events and death. *New England Journal of Medicine* 2004;350(7):655-63

<sup>9</sup> Hartmann F, Packer M, Coats AJ, Fowler MB, Krum H, Mohacsi P, et al. Prognostic impact of plasma N-terminal pro-brain natriuretic peptide in severe chronic congestive heart failure: a substudy of the Carvedilol Prospective Randomized Cumulative Survival (COPERNICUS) trial. *Circulation* 2004;110(13):1780-6

<sup>10</sup> Svensson M, Gorst-Rasmussen A, Schmidt EB et al. NT-pro-BNP is an independent predictor of mortality in patients with end-stage renal disease. *Clin Nephrol* 2009;71(4): 380-6

<sup>11</sup> Davies M, Hobbs F, Davis R, Kenkre J, Roalfe AK, Hare R, Wosornu D, Lancashire RJ. Prevalence of left-ventricular systolic dysfunction and heart failure in the Echocardiographic Heart of England Screening study: a population based study. *Lancet* 2001;358(9280):439-44.

<sup>12</sup> Taylor CJ, Roalfe AK, Iles R and Hobbs FDR. Ten-year prognosis of heart failure in the community: follow-up data from the Echocardiographic Heart of England Screening (ECHOES) study. *Eur J Heart Fail* 2012;14(2): 176-184

<sup>13</sup> Brandimarte F, Vaduganathan M, Mureddu GF, Cacciatore G, Sabbah HN, Fonarow GC, Goldsmith SR, Butler J, Fedele F, Gheorghiade M. Prognostic implications of renal dysfunction in patients hospitalised with heart failure: data from the last decade of clinical investigations. *Heart Fail Rev* 2013;18(2):167-76

<sup>14</sup> Januzzi JL, Chen-Tournoux AA and Moe G. Amino-Terminal Pro-B-Type Natriuretic Peptide Testing for the Diagnosis or Exclusion of Heart Failure in Patients with Acute Symptoms. *Am J Cardiol* 2008;101[suppl]:29A-38A

<sup>15</sup> [Guidelines for the diagnosis of heart failure. The Task Force on Heart Failure of the European Society of Cardiology. Eur Heart J 1995 Jun;16\(6\):741-51](#)

[16 European Society of Cardiology, Heart Failure Association of the ESC \(HFA\), European Society of Intensive Care Medicine \(ESICM\), Dickstein K, Cohen-Solal A, Filippatos G, et al. ESC guidelines for the diagnosis and treatment of acute and chronic heart failure 2008: the Task Force for the diagnosis and treatment of acute and chronic heart failure 2008 of the European Society of Cardiology. Developed in collaboration with the Heart Failure Association of the ESC \(HFA\) and endorsed by the European Society of Intensive Care Medicine \(ESICM\). European Journal of Heart Failure 2008 Oct;10\(10\):933-89](#)

<sup>17</sup> Ammar KA, Jacobsen SJ, Mahoney DW, Kors JA, Redfield MM, Burnett JC, Jr. Prevalence and prognostic significance of heart failure stages: application of the American College of Cardiology/American Heart Association heart failure staging criteria in the community. *Circulation* 2007;115(12):1563-70.

<sup>18</sup> [Levy D, Kenchaiah S, Larson MG, Benjamin EJ, Kupka MJ, Ho KK, et al. Long-term trends in the incidence of and survival with heart failure. New England Journal of Medicine 2002 Oct 31;347\(18\):1397-402](#)

Formatted: Font: Calibri, 12 pt

Formatted: Font: Calibri, 12 pt

1  
2  
3  
4  
5  
6  
7 <sup>19</sup> [Roger VL, Weston SA, Redfield MM, Hellermann-Homan JP, Killian J, Yawn BP, et al. Trends in heart failure incidence and survival in a community-based population. JAMA 2004 Jul 21;292\(3\):344-50](#)

8  
9  
10 <sup>20</sup> National Institute of Health and Clinical Excellence. Chronic Heart Failure. Management of chronic heart failure in adults in primary and secondary care. NICE 2010

11  
12  
13 <sup>21</sup> European Society of Cardiology guidelines for the diagnosis and treatment of acute and chronic heart failure 2012. European Heart Journal 2012;33:1787–1847  
14  
15 doi:10.1093/eurheartj/ehs104

16  
17 <sup>22</sup> Fuat A, Murphy JJ, Hungin AP, Curry J, Mehrzad AA, Hetherington A, Johnston JJ, Smellie WS, Duffy V, Cawley P. The diagnostic accuracy and utility of a B-type natriuretic peptide test in a community population of patients with suspected heart failure. Br J Gen Pract 2006;56(526):327-33  
18  
19  
20  
21  
22  
23  
24  
25  
26  
27  
28  
29  
30  
31  
32  
33  
34  
35  
36  
37  
38  
39  
40  
41  
42  
43  
44  
45  
46  
47  
48  
49  
50  
51  
52  
53  
54  
55  
56  
57  
58  
59  
60

1  
2  
3  
4  
5  
6  
7  
8  
9  
10  
11  
12  
13  
14  
15  
16  
17  
18  
19  
20  
21  
22  
23  
24  
25  
26  
27  
28  
29  
30  
31  
32  
33  
34  
35  
36  
37  
38  
39  
40  
41  
42  
43  
44  
45  
46  
47  
48  
49  
50  
51  
52  
53  
54  
55  
56  
57  
58  
59  
60

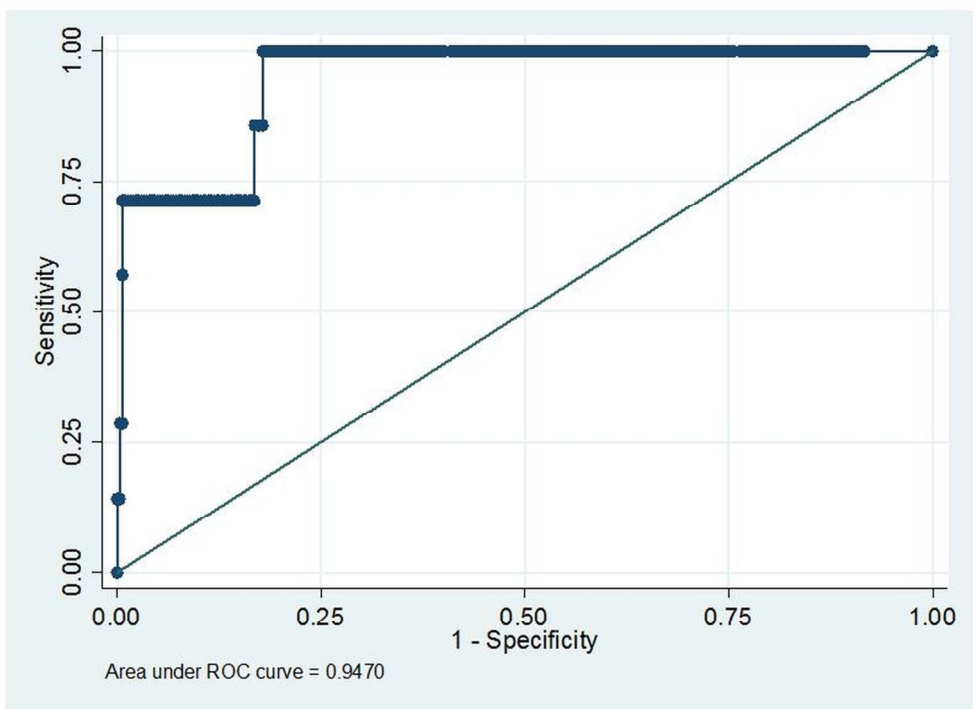

123x90mm (300 x 300 DPI)

1  
2  
3  
4  
5  
6  
7  
8  
9  
10  
11  
12  
13  
14  
15  
16  
17  
18  
19  
20  
21  
22  
23  
24  
25  
26  
27  
28  
29  
30  
31  
32  
33  
34  
35  
36  
37  
38  
39  
40  
41  
42  
43  
44  
45  
46  
47  
48  
49  
50  
51  
52  
53  
54  
55  
56  
57  
58  
59  
60

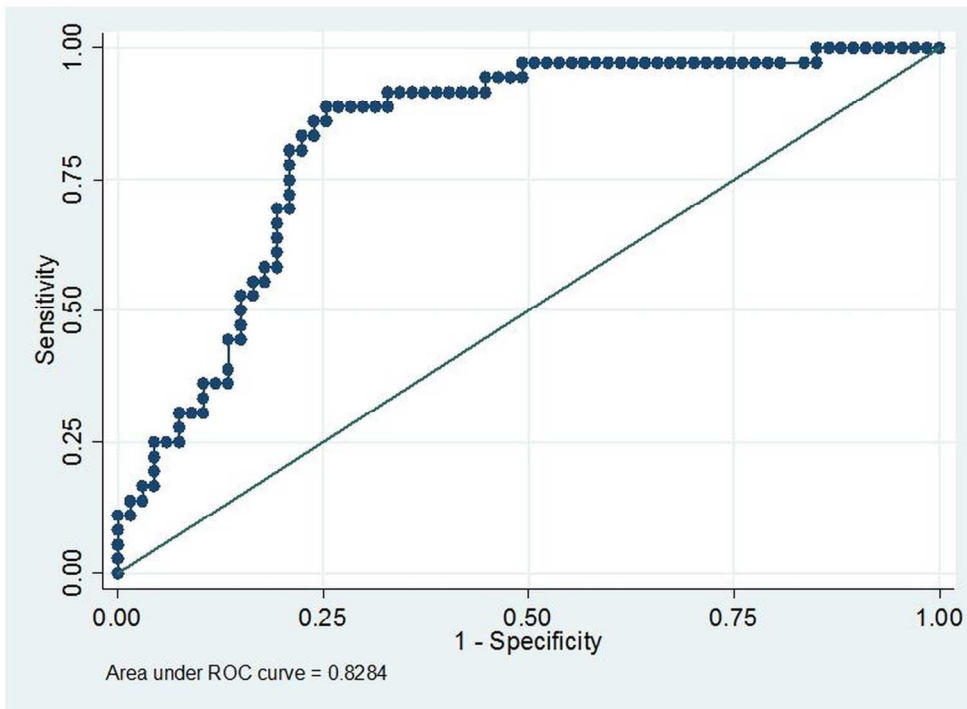

124x90mm (300 x 300 DPI)

View only

1  
2  
3  
4  
5  
6  
7  
8  
9  
10  
11  
12  
13  
14  
15  
16  
17  
18  
19  
20  
21  
22  
23  
24  
25  
26  
27  
28  
29  
30  
31  
32  
33  
34  
35  
36  
37  
38  
39  
40  
41  
42  
43  
44  
45  
46  
47  
48  
49  
50  
51  
52  
53  
54  
55  
56  
57  
58  
59  
60

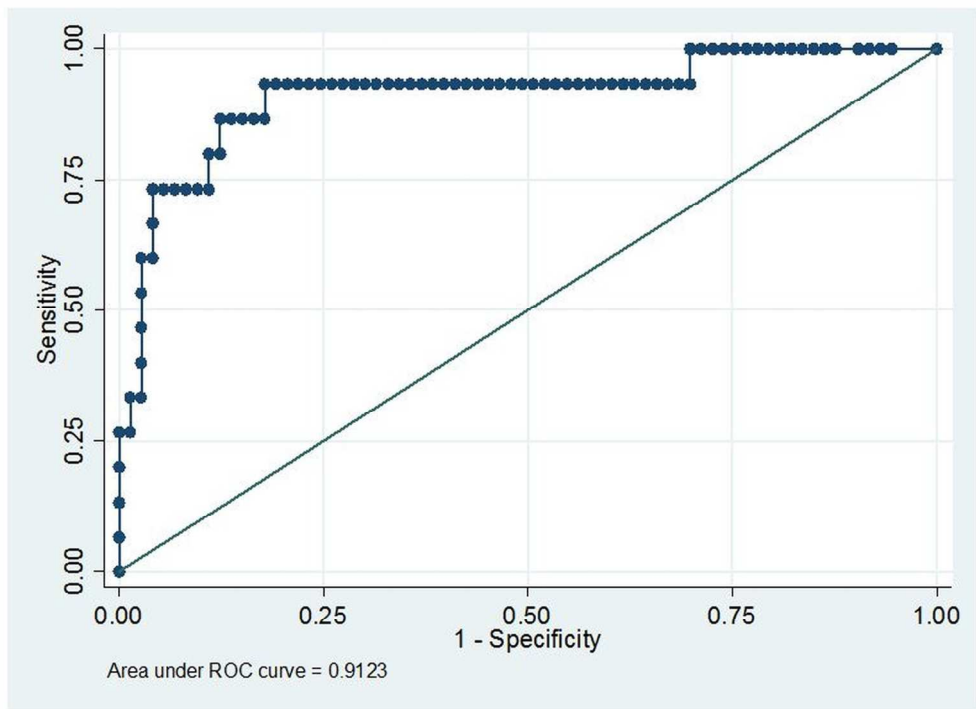

124x90mm (300 x 300 DPI)

View only

1  
2  
3  
4  
5  
6  
7  
8  
9  
10  
11  
12  
13  
14  
15  
16  
17  
18  
19  
20  
21  
22  
23  
24  
25  
26  
27  
28  
29  
30  
31  
32  
33  
34  
35  
36  
37  
38  
39  
40  
41  
42  
43  
44  
45  
46  
47  
48  
49  
50  
51  
52  
53  
54  
55  
56  
57  
58  
59  
60

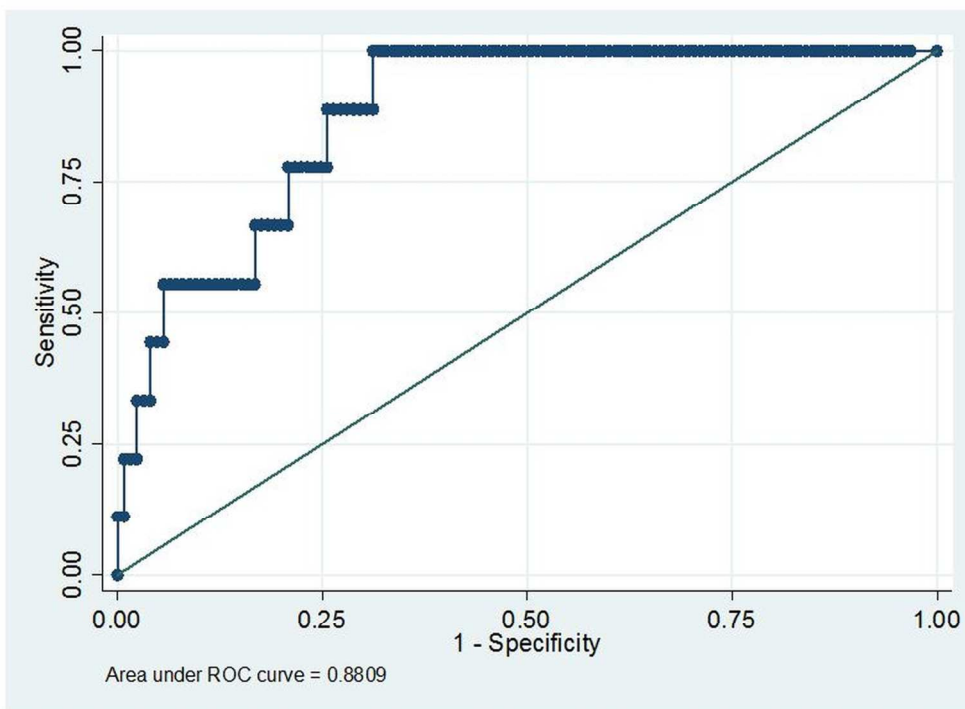

123x90mm (300 x 300 DPI)

ew only

1  
2  
3  
4  
5  
6  
7  
8  
9  
10  
11  
12  
13  
14  
15  
16  
17  
18  
19  
20  
21  
22  
23  
24  
25  
26  
27  
28  
29  
30  
31  
32  
33  
34  
35  
36  
37  
38  
39  
40  
41  
42  
43  
44  
45  
46  
47  
48  
49  
50  
51  
52  
53  
54  
55  
56  
57  
58  
59  
60

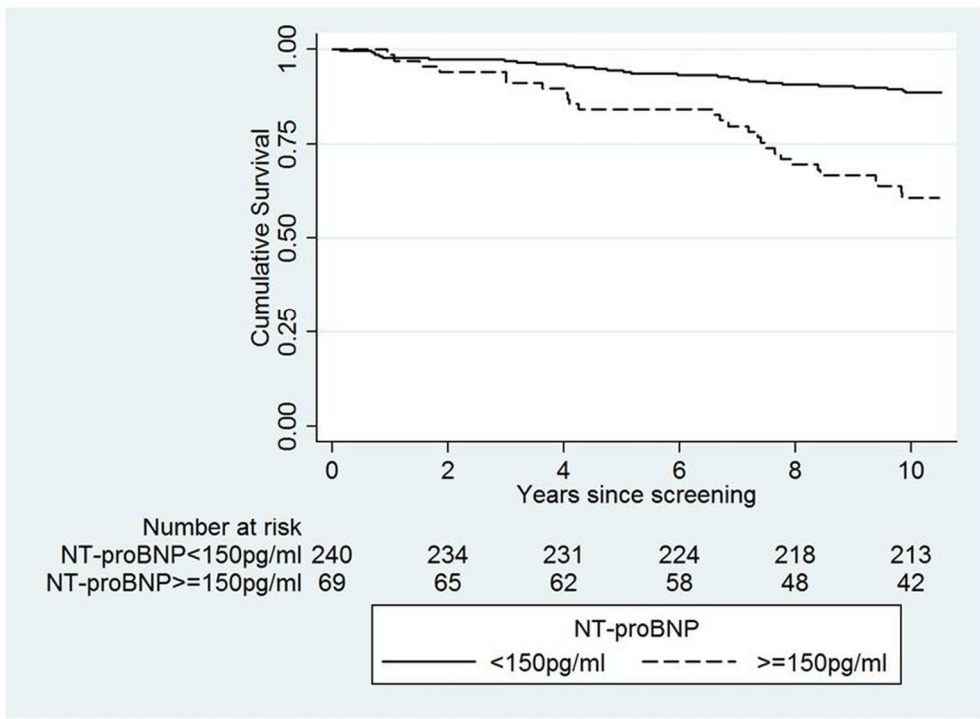

123x90mm (300 x 300 DPI)

view only



1  
2  
3  
4  
5  
6  
7  
8  
9  
10  
11  
12  
13  
14  
15  
16  
17  
18  
19  
20  
21  
22  
23  
24  
25  
26  
27  
28  
29  
30  
31  
32  
33  
34  
35  
36  
37  
38  
39  
40  
41  
42  
43  
44  
45  
46  
47  
48  
49  
50  
51  
52  
53  
54  
55  
56  
57  
58  
59  
60

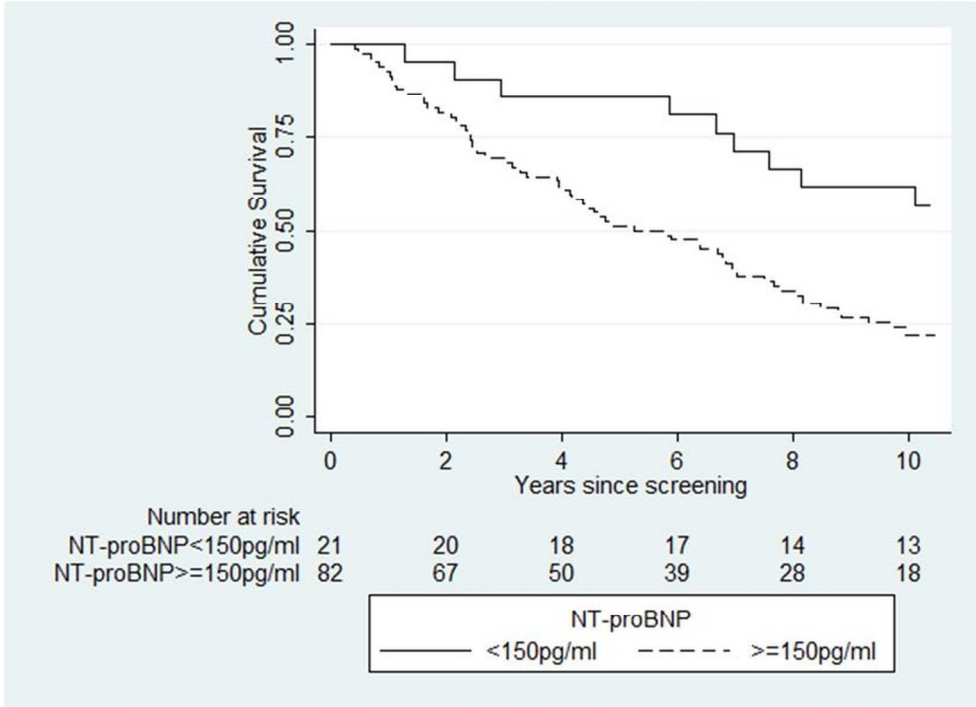

123x90mm (300 x 300 DPI)

view only

1  
2  
3  
4  
5  
6  
7  
8  
9  
10  
11  
12  
13  
14  
15  
16  
17  
18  
19  
20  
21  
22  
23  
24  
25  
26  
27  
28  
29  
30  
31  
32  
33  
34  
35  
36  
37  
38  
39  
40  
41  
42  
43  
44  
45  
46  
47  
48  
49  
50  
51  
52  
53  
54  
55  
56  
57  
58  
59  
60

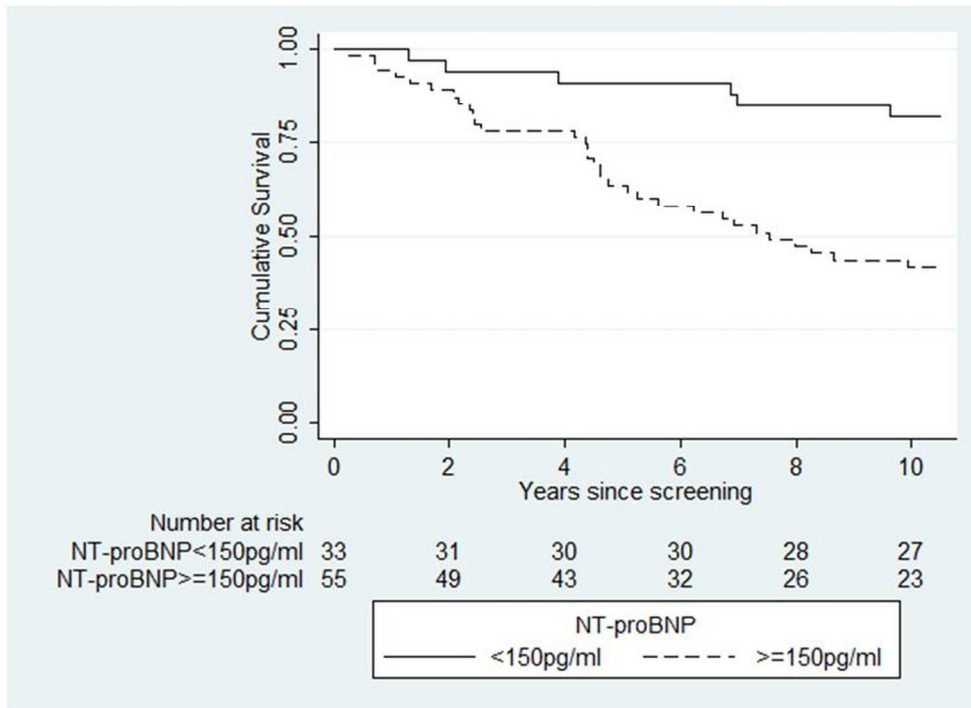

124x90mm (300 x 300 DPI)

View only

1  
2  
3  
4  
5  
6  
7  
8  
9  
10  
11  
12  
13  
14  
15  
16  
17  
18  
19  
20  
21  
22  
23  
24  
25  
26  
27  
28  
29  
30  
31  
32  
33  
34  
35  
36  
37  
38  
39  
40  
41  
42  
43  
44  
45  
46  
47  
48  
49  
50  
51  
52  
53  
54  
55  
56  
57  
58  
59  
60

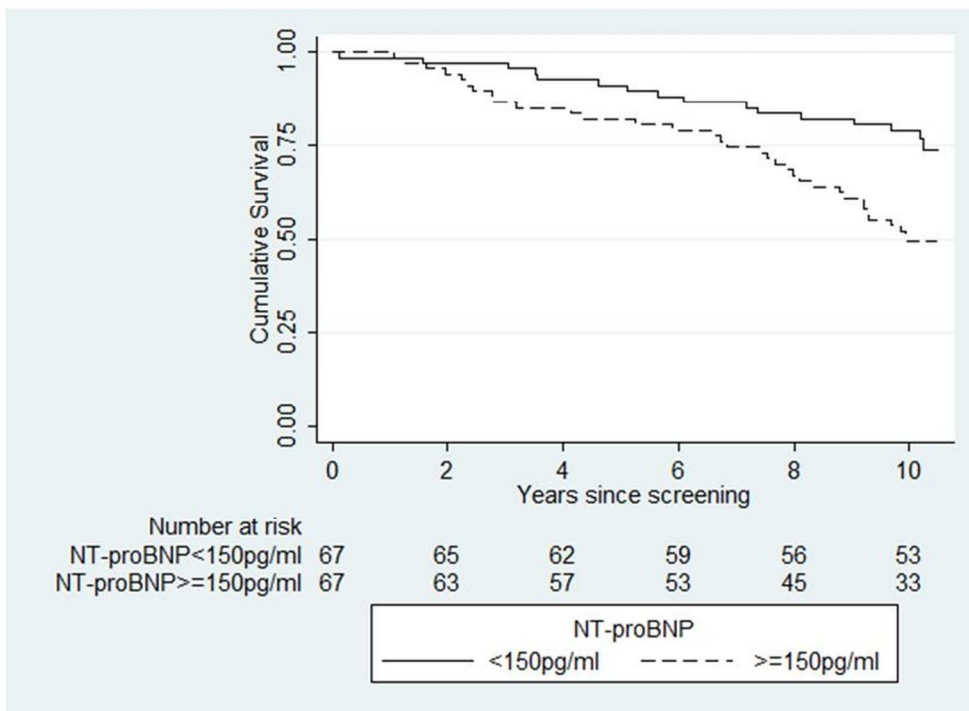

123x90mm (300 x 300 DPI)

view only
